# Supplementary material for: A novel regulatory mechanism network mediated by lncRNA TUG1 that induces the impairment of spiral artery remodeling in preeclampsia
Source: PubMed Central journal article supplement — Mol Ther. 2022 Feb 4;30(4):1692–705. doi: 10.1016/j.ymthe.2022.01.043 (PMC9077368; doi:10.1016/j.ymthe.2022.01.043), 2022-02-04
Supplement: mmc1.pdf [file mmc1.pdf]

YMTHE, Volume 30

## Supplemental Information

**A novel regulatory mechanism network mediated  
by lncRNA *TUG1* that induces the impairment  
of spiral artery remodeling in preeclampsia**

**Yetao Xu, Dan Wu, Bingqing Hui, Lijun Shu, Xiaotong Tang, Cong Wang, Jiaheng Xie, Yin Yin, Matthew Sagnelli, Nana Yang, Ziyang Jiang, Yuanyuan Zhang, and Lizhou Sun**

Supplementary file 1 : The list of PCR / CHIP-PCR primers and siRNAs sequences

| Real-time PCR primer sequences (human)                                                     |                                  |                                  |
|--------------------------------------------------------------------------------------------|----------------------------------|----------------------------------|
| Gene                                                                                       | Forward Primer                   | Reverse Primer                   |
| GAPDH                                                                                      | 5' - CTTTGTCAAGCTCATTTCCTGG -3'  | 5' - TCTTCCTCTTGTGCTCTTGC -3'    |
| ACTB                                                                                       | 5' - ATCAAGATCATTGCTCCTCCTGAG-3' | 5' - CTGCTTGCTGATCCACATCTG-3'    |
| TET1                                                                                       | 5' - GCAGCGTACAGGCCACCACT -3'    | 5' - AGCCGGTCGGCCATTGGAAG -3'    |
| TET2                                                                                       | 5' - TTCGCAGAAGCAGCAGTGAAGAG-3'  | 5' - AGCCAGAGACAGCGGGATTCCCTT-3' |
| TET3                                                                                       | 5' -GACGAGAACATCGGCGGCGT -3'     | 5' - GTGGCAGCGTTGGGCTTCT-3'      |
|                                                                                            |                                  |                                  |
| TUG1                                                                                       | 5' -TAGCAGTTCCCAATCCTTG -3'      | 5' -CACAAATTCATCATTCCC -3'       |
| DUSP1                                                                                      | 5' - AGTACCCCACTCTACGATCAGG -3'  | 5' - GAAGCGTGATACGCACTGC -3'     |
| DUSP2                                                                                      | 5' - TACTTCTCGGAGGAGGCTT -3'     | 5' - TAGACAGGAGCCCTGGAGTC -3'    |
| DUSP4                                                                                      | 5' - AGTGAAGATAACCACAAGG -3'     | 5' - GCTTAACGAACTCGAAGG -3'      |
| DUSP5                                                                                      | 5' -TGTCGTCCTCACCTCGCTA -3'      | 5' - GGGCTCTCACTCTCAATCTC -3'    |
| DUSP6                                                                                      | 5' - GATCACTGGAGCCAAAAC -3'      | 5' - CAAGCAATGTACCAAGACAC -3'    |
| DUSP7                                                                                      | 5' -CCAAGAAGTGTGGTGTCTG -3'      | 5' -ACAAAGTCGTAGGCGTCGTT-3'      |
| DUSP9                                                                                      | 5' - CAGCCGTTCTGTCACCGTC -3'     | 5' - CAAGCTGCGCTCAAAGTCC -3'     |
| DUSP10                                                                                     | 5' - TTTGAAGAGGCTTTTGTGAGTT -3'  | 5' - GGGAGATAATTGGTCGTTT -3'     |
| DUSP12                                                                                     | 5' - gcagccaggattgtatttcg-3'     | 5' - agtaggtccgtctcgggttt -3'    |
| DUSP13                                                                                     | 5' - ATCTTGCCCTTCTGTTCTT-3'      | 5' - CTCCCACACTGGTGAGCTT-3'      |
| FOXP1                                                                                      | 5' - GTTGCACTCTGTGGCATT-3'       | 5' - TGACCGCCGCACTCTAGTAA -3'    |
|                                                                                            |                                  |                                  |
|                                                                                            |                                  |                                  |
| CHIP-PCR primer sequences (human)                                                          |                                  |                                  |
| TUG1 CHIP primer-1                                                                         | 5'-CATGAACACTGTATGTTTCTGTGGA-3'  | 5'-CTGGCAGATTGCTCACATCC-3'       |
| TET3 CHIP primer-1                                                                         | 5'-AGCCTCCTTATTTTCGCACCC-3'      | 5'-TTGCTAGAGGAGGAAGCCCT-3'       |
| TET3 CHIP primer-2                                                                         | 5'-CTGAGCGCAATGTGAATGGG-3'       | 5'-GCGCCCAAGATAAAAACAGCC-3'      |
| TET3 CHIP primer-3                                                                         | 5'-CTCACCAATGCAGGTCCACA-3'       | 5'-ACACTGTTGGATGCTGCTGA-3'       |
| DUSP2 CHIP primer-1                                                                        | 5'- TGACACCACTCCCCATCTC-3'       | 5'- CAGCACCTGGGTCTCAAAC-3'       |
| DUSP2 CHIP primer-2                                                                        | 5' - GTATGTCCCGGTGTGTCCTC-3'     | 5'- ACCCAGTCTGCAAGGGAGAT-3'      |
| DUSP4 CHIP primer-1                                                                        | 5' - GTCCCTTCTTAGCTCTCGCC-3'     | 5'- CATCTCCCGACTCCAGCTA-3'       |
| DUSP4 CHIP primer-2                                                                        | 5'- GGCGTCCCTTCTTAGCTCTC-3'      | 5'- GACTCCTTCCCGTGCCAATA-3'      |
| DUSP5 CHIP primer-1                                                                        | 5'- CCGGCCAAAGACTAAGACCC-3'      | 5'- GCGTACTGGAGGTATGTGGG-3'      |
| DUSP5 CHIP primer-2                                                                        | 5'- CGCGGAAGAGAGAACGAAGA-3'      | 5'- ATGTGAATGAGTGCCGTCCG-3'      |
| U6                                                                                         | 5' - CTCGCTTCGGCAGCACA -3'       | 5' - AACGCTTACGAATTTGCGT -3'     |
| Ago2                                                                                       | 5' - CCCGCATCATCTTCTACCGC -3'    | 5' - GCTTGCCCCCGCTCGTT -3'       |
| <b>hsa-miR-218-5p inhibitor (human)</b>                                                    |                                  |                                  |
| sense 5' - UUGUGCUUGAUCUAACCAUGU -3'                                                       |                                  |                                  |
| antisense 5' - ACAUGGUUAGAUAAGCACAA -3'                                                    |                                  |                                  |
| <b>TUG1 siRNA sequence (human)</b>                                                         |                                  |                                  |
| 1# sense 5' -UAGAAUUGUUCUCUGGCUAUAUCCC-3' ,<br>antisense 5' - GGGAUUAAGCCAGAGAACAAUUCUA-3' |                                  |                                  |
| 2# sense 5' -GCUUGGCUUCUAUUCUGAAUCCUUU-3' ,                                                |                                  |                                  |

|                                                                                           |
|-------------------------------------------------------------------------------------------|
| antisense 5' - AAAGGAUUCAGAAUAGAAGCCAAGC-3'                                               |
| 3# sense 5' -CAGCUGUUACCAUUCAACUUCUAAA-3' ,<br>antisense 5' -UUAAGAAGUUGAAUGGUAACAGCUG-3' |
| <b>TET3 siRNA sequence (human)</b>                                                        |
| 1# sense 5' -CAGCAACUCCUAGAACUGAtt-3' , antisense 5' - UCAGUUCUAGGAGUUGCUGga -3'          |
| 2# sense 5' - CGAUUGCUGCAACAAAUAtt-3' , antisense 5' - UAUUUGUUCGACGCAAUCGca -3'          |
| <b>TET1 siRNA sequence (human)</b>                                                        |
| 1# sense 5' - CCCAAGUCAUGCAGCCCUAtt-3' , antisense 5' -UAGGGCUGCAUGACUUGGGcg -3'          |
| 2# sense 5' - GCUAUACGCUAAAUACCAAtt -3' , antisense 5' -UGGUAAUUAAGCGUAUAGCat -3'         |
| <b>TET2 siRNA sequence (human)</b>                                                        |
| 1# sense 5' - CCCAAUCUCUCCAAUCAAAAtt-3' , antisense 5' - UUUGAUUGGAGAGAUUGGGtt            |
| 2# sense 5' - GAGUUGUCCUGUGAGAUCAtt-3' , antisense 5' -UGAUCUCACAGGACAACUCat -3'          |
| <b>SAHH siRNA sequence (human)</b>                                                        |
| 1# sense 5' - CAAGCUAACUGAGAAGCAAtt-3' , antisense 5' - UUGCUUCUCAGUUAGCUUGgt -3'         |
| <b>FXOP1 siRNA sequence (human)</b>                                                       |
| 1# sense 5' - CTCAGTCCACACTCCCAAA -3'                                                     |
| 2# sense 5' - CCACAGAGCTTACCTCATA -3'                                                     |
| 3# sense 5' - CTGGTTCACACGAATGTTT -3'                                                     |
| <b>SUV39H1 siRNA sequence (human)</b>                                                     |
| 1# sense 5' - GCATCACTGTAGAGAATGA -3'                                                     |
| 2# sense 5' - GGGTCCGTATTGAATGCAA -3'                                                     |
| 3# sense 5' - GGGCCTTCGTGTACATCAA -3'                                                     |

Supplemental file 2: Uncut western gel images.

**Uncut Western gel images**

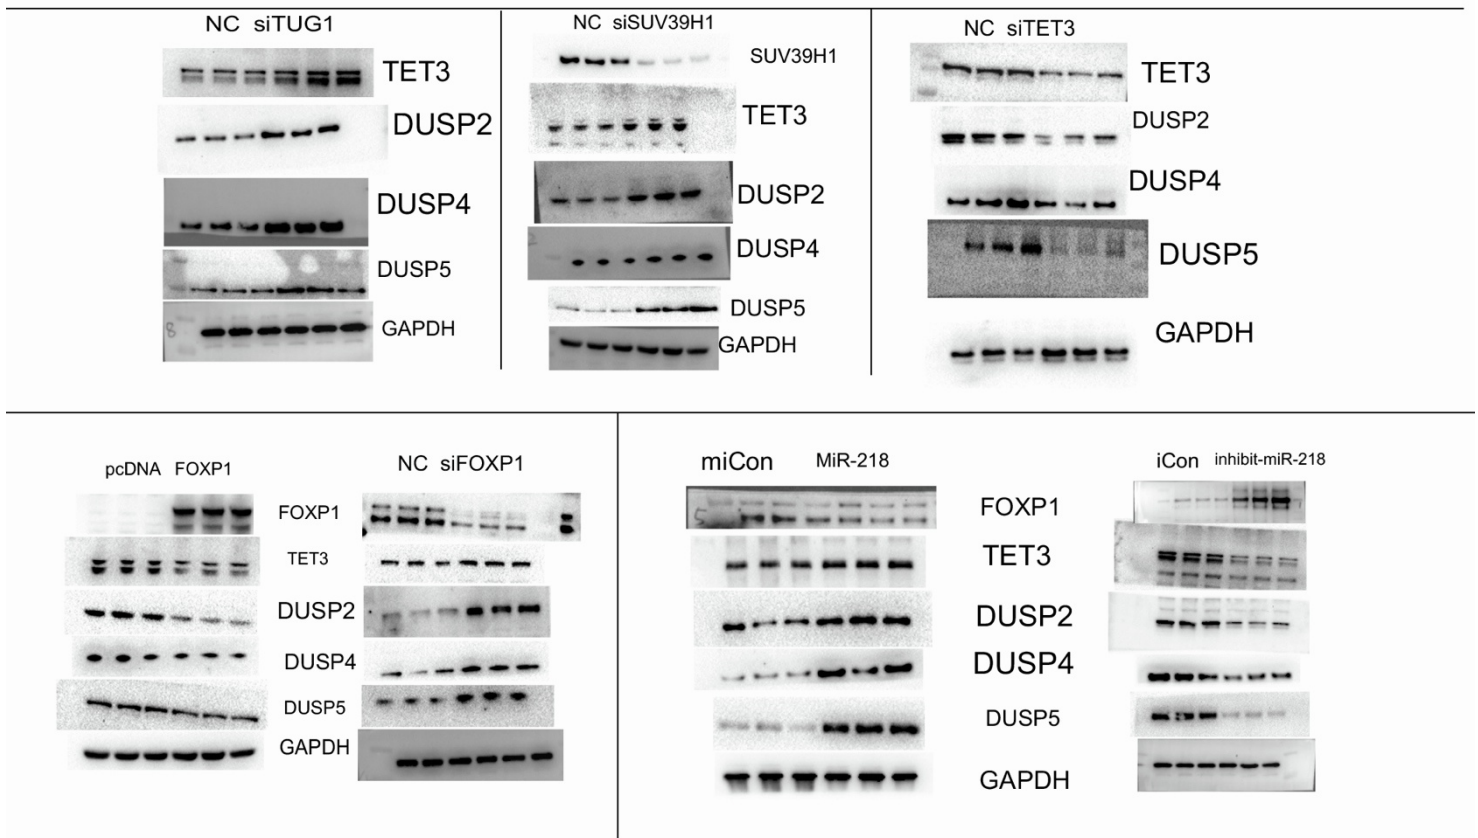

Supplemental file 3: The binding sites of TUG1 with FOXP1.

**TUG1 promoter region (2000bp)**

**Binding to FOXP1 Prediction**

>NC\_000022.11:30967211-30969211 Homo sapiens chromosome 22, GRCh38.p12 Primary Assembly

(-2000)  
 AGAACCATGAACACTGTATGTTTCTGTGGAAATTTGGGGAAAGACTATCTAAATA (-  
 1943) GAGATATAACAAGT (-1929)  
 TGTGCCGTTTCCTGTTTAGCATATACAATAATATTGGAT  
 GTGAGCAATCTGCCAGGAAGATAATGCCAACTTCTGAAAAATAAAAAATTTCTTCTTGAA  
 AGTTGTCATTTAAATGTCTTCTGTTTTCTTGTT (-1796) AGAAAGTAAACACTT (-1782)  
 GTTATAAACCTAACTGTTTAGGACGTTGTCACTACAGAGGGGAAACGGTTGATACTAAA

ATAGTCCAACATTTGGCGATCCAATAGAGCAGTATTTGTTGGATTCTATAAACACTTGAA  
TGAAACAACACTCAACATATTGACTTCAAATAACTAAAGTTTGCATTTAGAAAATTTG (-  
1604) ATCCAATAAACAAAA (-1590) ATCAGTGATCTCAGTTCTTCAATACAGAGCT  
CAAGATATCCAGTGACACATTTCACTCCAGTGGGATACATCTCAAAAAGTGAAAAAGCAA  
AATTTTCTGGGGAAACGATTTCCATATAATATCAAGGAACGAGTACTGGTTACCTCAGT  
GGCACCTAGAGGATACTTACGAATTTGTGTGCAGATATTCAAAGGTTAGCTGAGCTCGAT  
TCAGACTGCTGTAATTTGTGAAAGCCATGACTGCAATAAGGTCTCCAGCCCTTCACCCG  
CTAACTGGGAAATATAACCTTATAATGATATCGATTTCCAGGATTCTGTCCAGTAAAGCT  
TCAGTAAGTCTGTGCTCCTTAATGACAGTTAAAGTAACCTAGTAGCTATCCAAAATATATG  
CAGAGATGTTTAAACTACAATTTCTTCAAGTGTTTTTTTTTAATCTTCTCAATGATTTATG  
ATGTAATATTTTGAAGGAACTATGTCATAAATCTGTAGCTTTAAGGAGCTTTTAGCATT  
AGTTGCGATAGCTCAATTCAGACAATCTGAGTCTCGTGTGGATGGTCCTGAAGGAGATG  
GTCCTTGAGTGGGTGGTTTATGACTGCTCCATCTTCATGTTCTTCCAGCCTTTTTTGGTTC  
CCCGAAATTTCTGTGAGGAAATTTACCAACGCGGAAATTTACCCACTTCTGTGAGAAA  
CTGATCAGCCATGTCTTCGCCACACGTGATGCCAGGATTCTTAAACAGGCCCAAGACCG  
GAGACCAAGATGTCGACGGAGTGTTATATGGCGCAAGTTGCAGCTTACCACCTCCCAA  
GTGAAAAAGCTCCTAGGCACTCACGATTTCTTTTTTCAAAGCCGGACCAAACCCAGTTCA  
GGGTGGTGGTCAGATTACCTCACACTTGGCCACATAAACACCTCACAAATGACCCGCC  
CACAGCACCTCGGGCAGGCCGCGCCCCGCCCCACGTCCCTCAGACAACAGCCTCAG  
CCTCCCAGGCCCTTCCCGGGCCTCGGTCCCGTGGCCGCCTCCCACGAAGAGGAGCTA  
CTCCCGGCTTCCAAGGACCGGATCGAGGGCAGTGGCGAGCGCACCACTGACCGGGC  
ACTACCCGGATCTCACAACACTGCCTTTGTCCCTCCCCGCGGAATTGGAACCCAACAGCCG  
CAGAGCGCTCTTGAACCATGTGCTGCTGCCGCCTCCGCCGCCGCCGCCGCTGCCTCC  
GCCGCCGCCGCCGCCGCCGCCGCCGCCGCTAGTTGAGATGGTGACAGGATTAG  
CAACACGAAATTCGGCGTTTGTAGAGCTGCTCTGCCGCCGCCGTACAGACACCACAGCC  
ACCGCTTTGTCTCCGATAGTGACACAGCCCCGGCCACCTCGCACACTCCCCGACGCC  
CCAAGCCCCCGAGGCCTCCGCGGAGCATTAGCCAATCACAAGCTGCAGCTCCTCCC  
GCCCCGCCCTGATGTACAGCCTCCTGATTGGCGGGCTGCGTGTCCCATGTGACCGG  
ATCTTGGTTGGCCGGTCCCGCCCCTGTCACGTGACAGCGTGCGCCTCTCTT (-1)

**Yellow:** The position of the representative locus in the promoter region.

**Red:** The corresponding base sequence site.

6 putative sites were predicted with these settings (80%) in sequence named **NC\_000022.11:30967211-30969211**

| Model ID | Model name | Score  | Relative score    | Start | End | Strand | predicted site sequence |
|----------|------------|--------|-------------------|-------|-----|--------|-------------------------|
| MA0481.1 | FOXP1      | 10.085 | 0.836492339754999 | 57    | 71  | 1      | GAGATATAACAAGT          |
| MA0481.1 | FOXP1      | 14.567 | 0.909936734368791 | 189   | 203 | -1     | AACAAGAAAACAGAA         |
| MA0481.1 | FOXP1      | 13.030 | 0.884750649022651 | 204   | 218 | 1      | AGAAAGTAAACACTT         |
| MA0481.1 | FOXP1      | 13.467 | 0.891911559430109 | 396   | 410 | 1      | ATCCAATAAACAAAA         |
| MA0481.1 | FOXP1      | 10.182 | 0.838081832454137 | 861   | 875 | -1     | TAAAAAAAAAACTT          |
| MA0481.1 | FOXP1      | 8.556  | 0.811437346590232 | 863   | 877 | -1     | ATTAAAAAAAAAACAC        |

**Comment:** This type of analysis has a high sensitivity but abysmal selectivity. In other words: while true functional will be detected in most cases, most predictions will correspond to sites bound in vitro but with no function in vivo. A number of additional constraints of the analysis can improve the prediction; phylogenetic footprinting is the most common. We recommend using the [ConSite](#) service, which uses the JASPAR datasets.

The review [Nat Rev Genet. 2004 Apr;5\(4\):276-87](#) gives a comprehensive overview of transcription binding site prediction

#### Supplemental file 4: Detailed process of methyltarget sequencing.

##### Acknowledgement

We acknowledged the technical support from the Shanghai Genesky Biotechnology Company (Shanghai, China).

## Detailed process of methyltarget sequencing.

### *CpG islands selected*

CpG islands located in the proximal promoter of DUSP2, DUSP4 and DUSP5 were selected for measurement according to the following criteria: (1) 200 bp minimum length; (2) 50% or higher GC content; (3) 0.60 or higher ratio of observed/expected dinucleotides CpG.

### *Bisulfite conversion and multiplex amplification*

DNA methylation level was analysis by MethylTarget® (Genesky Biotechnologies Inc., Shanghai, China), an NGS-based multiple Targeted CpG methylation analysis method. Specifically, the genomic regions of interest were analyzed and transformed to bisulfite-converted sequences by geneCpG software. PCR primer sets were designed with the Methylation Primer software from bisulfate converted DNA.

Genomic DNA (400ng) was subjected to sodium bisulfite treatment using EZ DNA Methylation™-GOLD Kit (Zymo Research) according to manufacturer's protocols. Multiplex PCR was performed with optimized primer sets combination. A 20 µl PCR reaction mixture was prepared for each reaction and included 1x reaction buffer (Takara), 3 mM Mg<sup>2+</sup>, 0.2 mM dNTP, 0.1 µM of each primer, 1U HotStarTaq polymerase (Takara) and 2 µl template DNA. The cycling program was 95°C for 2 min; 11 cycles of 94°C for 20 s, 63°C for 40s with a decreasing temperature step of 0.5°C per cycle, 72°C for 1 min; then followed by 24 cycles of 94°C for 20 s, 65°C for 30 s, 72°C for 1 min; 72°C for 2 min.

### *Index PCR*

PCR amplicons were diluted and amplified using indexed primers. Specifically, a 20 µl mixture was prepared for each reaction and included 1x reaction buffer (NEB Q5™), 0.3 mM dNTP, 0.3 µM of F primer, 0.3 µM of index primer, 1 U Q5™ DNA polymerase (NEB) and 1 µL diluted template. The cycling program was 98°C for 30 s; 11 cycles of 98°C for 10 s, 65°C for 30 s, 72°C for 30 s; 72°C for 5 min. PCR amplicons (170bp-270bp) were separated by agarose electrophoresis and purified using QIAquick Gel Extraction kit (QIAGEN).

### *Sequencing*

Libraries from different samples were quantified and pooled together, followed by sequencing on the Illumina MiSeq platform according to manufacturer's protocols. Sequencing was performed with a 2x150bp paired-end mode.

### *Data analysis*

FLASH (Fast Length Adjustment of SHort reads) is an accurate and fast tool, which was used to merge paired-end reads[1]. Fastq to fasta format step was then processed using the Fastx toolkit ([http://hannonlab.cshl.edu/fastx\\_toolkit/index.html](http://hannonlab.cshl.edu/fastx_toolkit/index.html)). Reads with fasta format were mapped to targeted Bisulfite Genome (hg19) by Blast [2]. Unmapped reads were filtered and mapped reads with coverage greater than 90% and identity greater than 95% were kept as effective reads and were used for following statistics. Sequencing depth for each amplicon per sample was calculated by blasting the effective reads against the targeted genome region. Reads less than 10-fold were removed and overall sequencing depth for each sample were evaluated. Methylation and haplotype were analyzed using Perl script. Statistics were performed by t-test and ANOVA.

1 Magoc T , Salzberg S L . FLASH: fast length adjustment of short reads to improve genome assemblies[J]. Bioinformatics, 2011, 27(21):2957-2963.

2 Camacho C , Coulouris G , Avagyan V , et al. BLAST+: architecture and applications[J]. BMC

Bioinformatics, 2009, 10(1):421-0.



Supplemental file 5: Promoter demethylation levels of DUSP2, DUSP4 and DUSP5  
genes detected by pyrosequencing.

**DUSP2**

Assay Name: PM403-1FS

Sample ID: 1-1

siCon

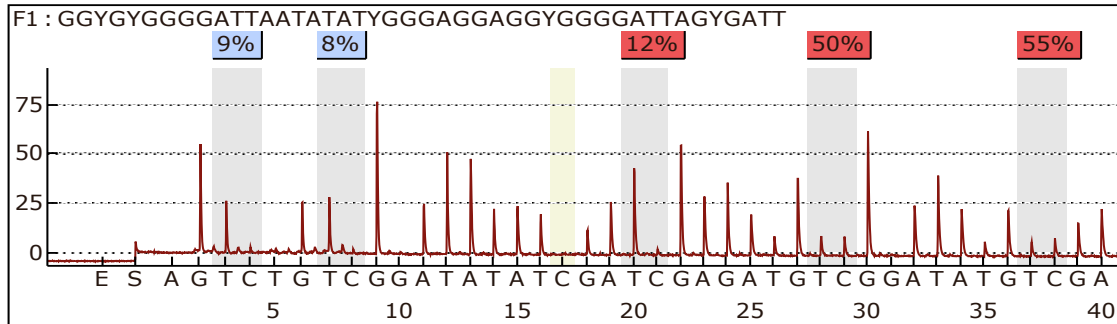

siTET3

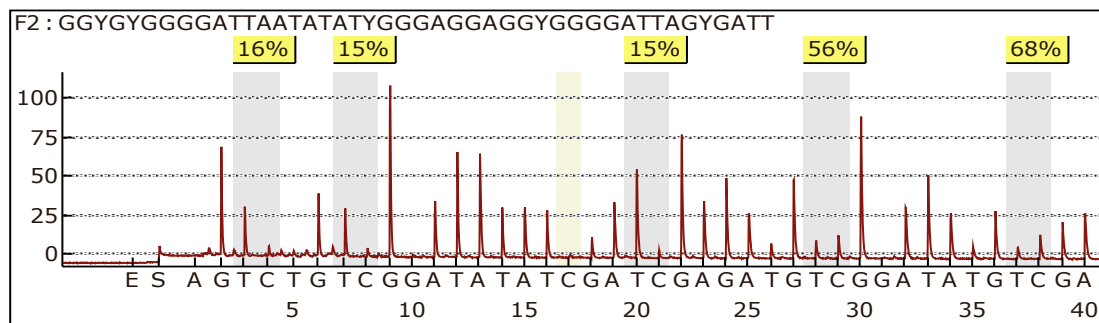

**DUSP2**

Assay Name: PM403-2FS

Sample ID: 2-1

siCon

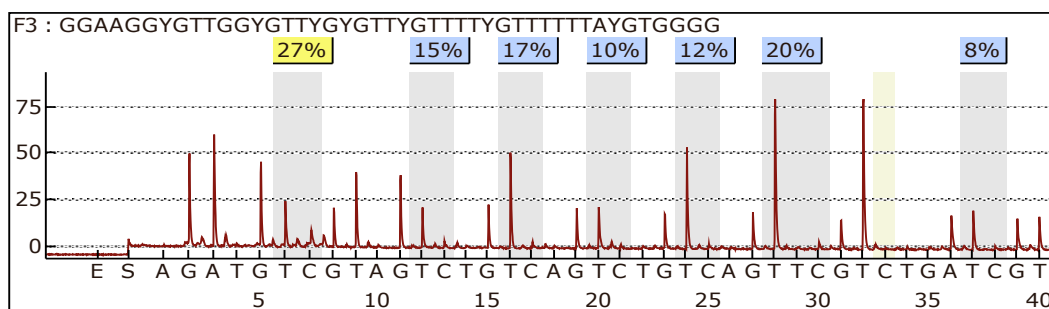

siTET3

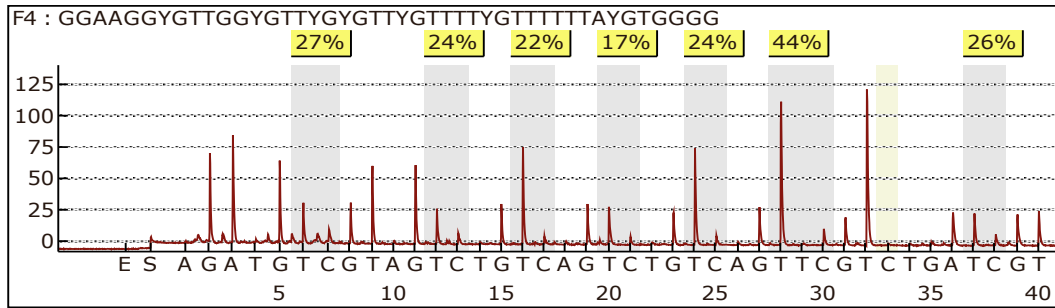

**DUSP4**

Assay Name: PM43-3FS

Sample ID: 3-1

siCon

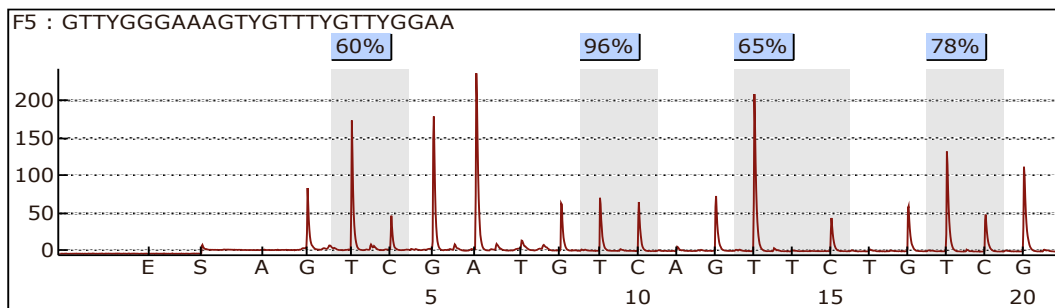

siTET3

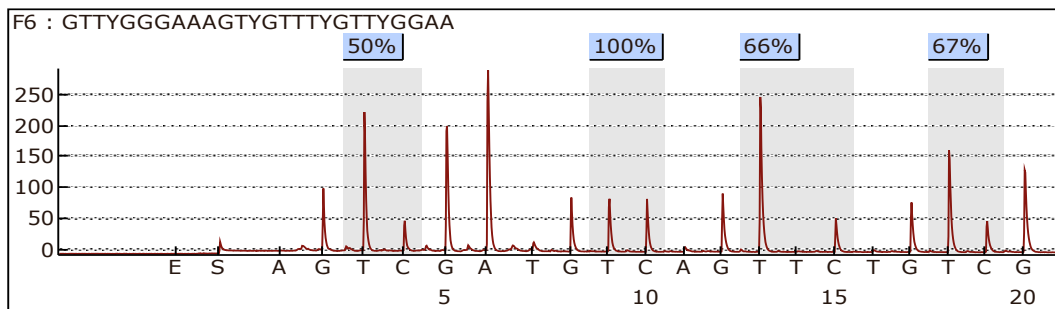

**DUSP4**

Assay Name: PM403-4FS

Sample ID: 4-1

siCon

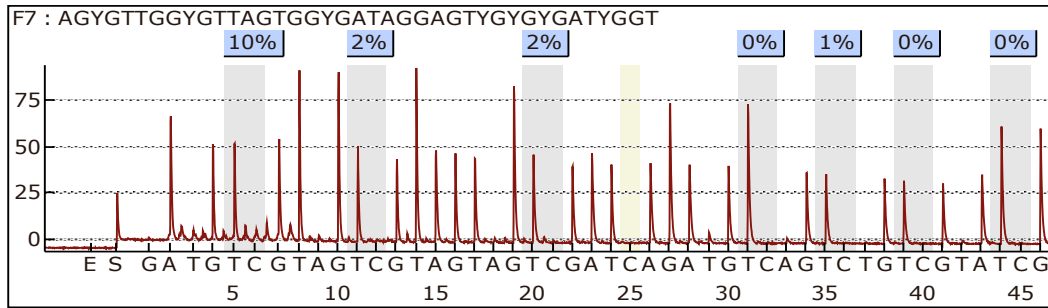

siTET3

### DUSP4

Assay Name: PM403-5FS

Sample ID: 1

siCon

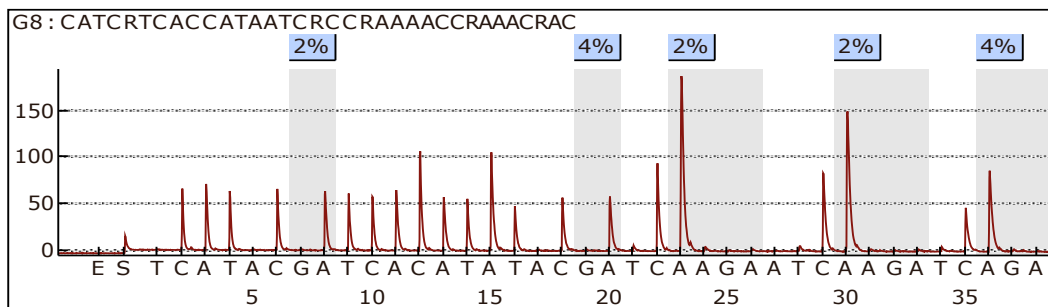

siTET3

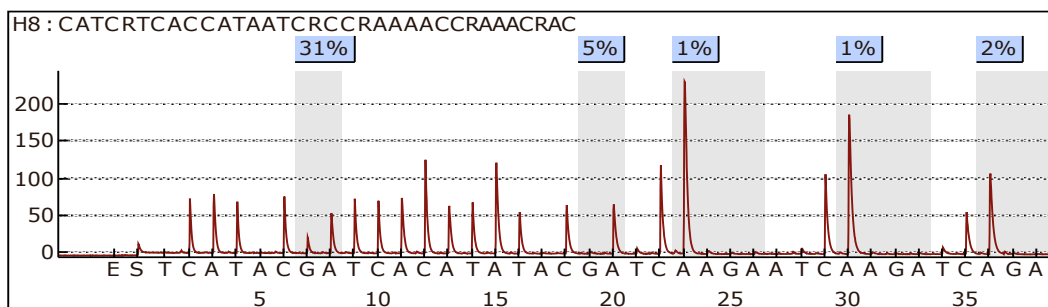

### DUSP5

Assay Name: PM403-6RS

Sample ID: 6-1

siCon

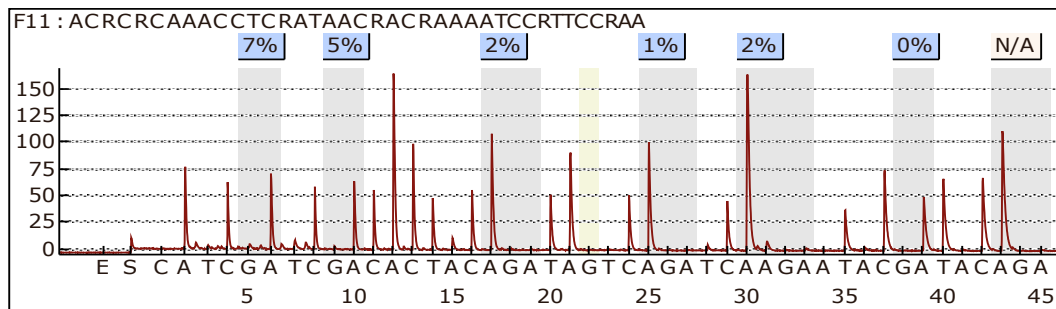

siTET3

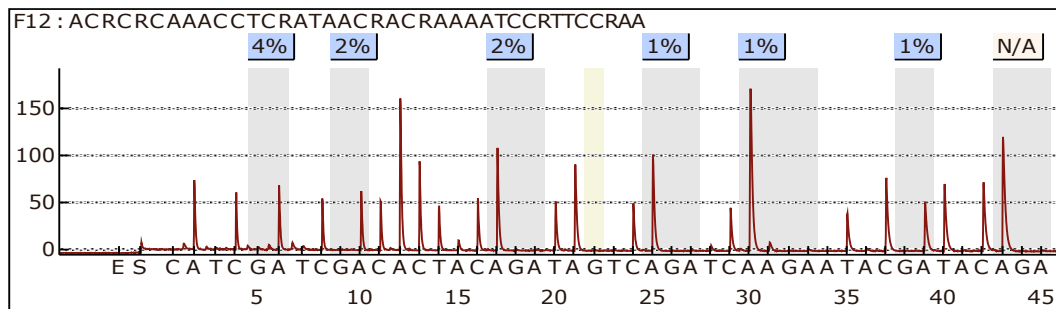

Figure legends

HTR-8/SVneo cells were transfected with siTET3 or siCon. After 48-h post-transfection, Promoter demethylation levels of *DUSP2*, *DUSP4* and *DUSP5* genes detected by pyrosequencing. The methylation levels of the CpG sites in the *DUSP2*, *DUSP4*, and *DUSP5* genes are shown.

Supplemental file 6: Single-nucleotide resolution genome-wide DNA methylation profiling (GEO: GSE117190) after TET3-knockdown in primary human leiomyoma cells.

DUSP2

(+1)

TTAACCCGGGCCCGCCGCGGAGGGCGCCCGGAGTCGACCGCTCGGGCAGCGCCACCGCCACGAGAGCCCC  
GGACGCGGGAAAGACCGAAAGGAAGAGGAAGAGGCACCGGTGGCCATGGGGCTGGAGGCGGC (10%-  
23%) GCGCGAGCTGGAGTGC (0%-23%) GCGGC (0%-15%)  
GCTGGGCACGCTGCTGCGGGATCCGCGGGAGGCGGAACGCA (+193)

DUSP4

(-578) AAACCTACGGGGCTGTCACGCGGGGAAGC (52%-87%)

GCGAAGGTGCCAAGGGATGAAAGCTCAAACCCGAGCCCTGGCCTCCTCAGC (11%-33%)  
CGGCTATTTCTTTGGCGCCGCCCGCTAGCGGCGGGGTGCAGCGGCGGCACAGGTGCCGGTGTCCGGG  
TGGAGGCGCGGCGCAGGCTGGGCCCGCGGGTAGACGGCGAAAGGC (77%-91%)  
GCCGCGGCTCCATTACAAAAGTCCGGGCGCTGCCCGCCGCTGGCGGCGGGTC (0%-11%)  
GGAGGCCGCTCCCTCTTCTCTCGGCCTCGGTTTTATGAATGGGCCTGATG (-280)

DUSP5

(-671)

TCACCGCCGACCCCAACCCCGTTTTACTTTTACAACTTTATTATGAAAAATATCAAACATACAGA  
AAAGTGGAGAAAACAGTATAACGAATCCGGCCACCCATCACCCAGCCTCAGCGATGACCAACCCGCGCC  
TGACCTCTCCAGTCATCTATAACCCACCCCTCGAGGCAAATCTCC (0%-18%) GAC (0%-12%)  
GTCCTCTCCTTACACGC (0% -10% ) GCAGACCTCGGTAGCGACGGGAATCC (0%-9%)  
GTTCCGACTCCTCTGGGGCCCTGGCCGGCTCCCTCGGCCTGCTC (-397)

Figure legends

Sequences of promoter region of DUSP2, DUSP4, and DUSP5. The differentially methylated CpGs are highlighted in red. Purple numbers mark percentage of methylation in siCon (left) or siTET3 (right) transfected leiomyoma cells as determined by genome-wide single-nucleotide-resolution methylation analysis. Blue numbers indicate positions relative to the transcriptional start sites (+1). ChIP-qPCR amplified regions are underlined.

Supplemental file 7: Immunohistochemistry staining (IHC) using antibodies against FOXP1, TET3 and DUSP5 in rat model placenta.

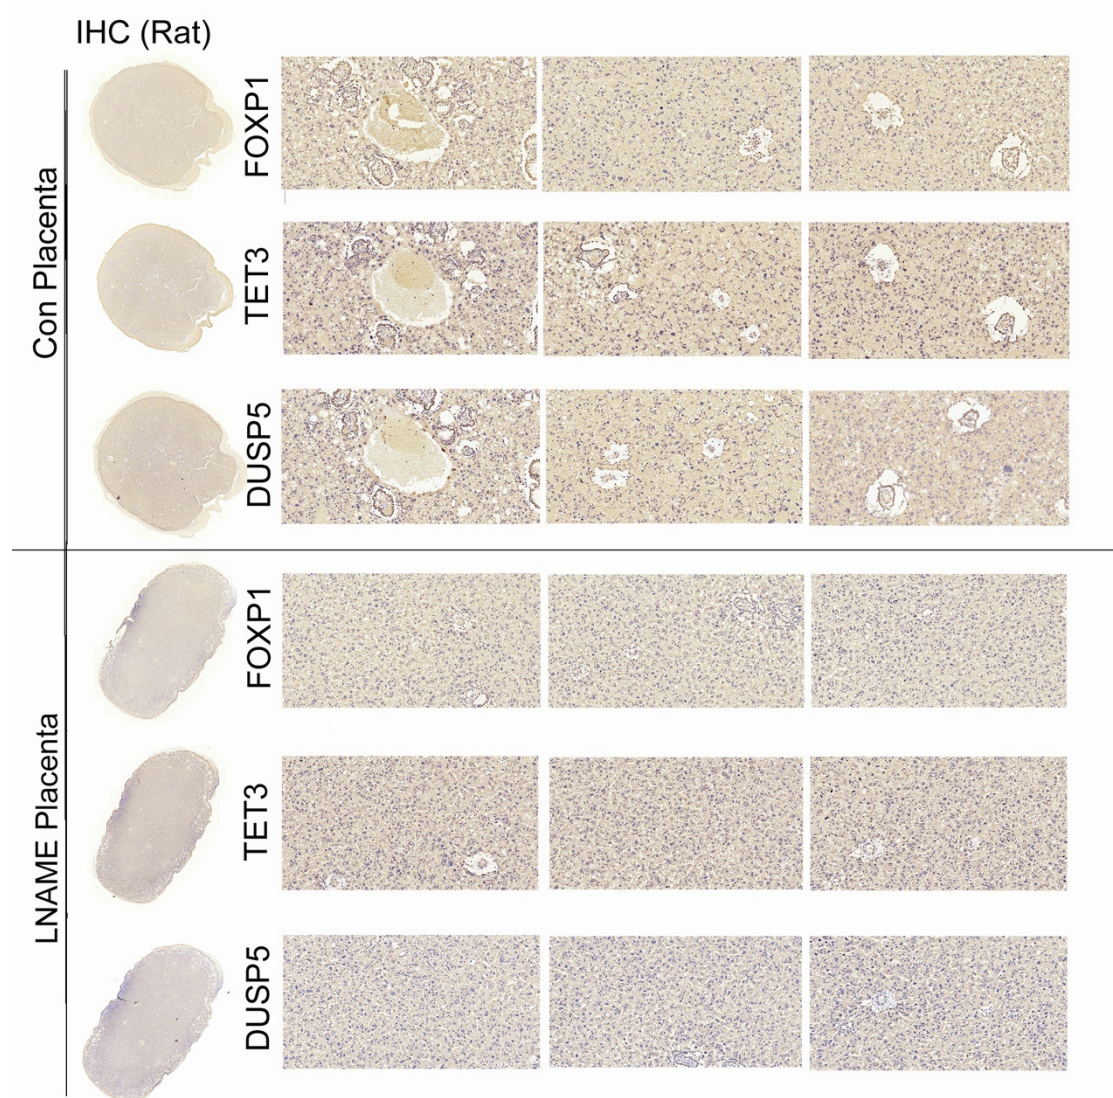

Figure legend:

Six images on the left show representative photomicrographs of hematoxylin-eosin-stained placenta sections of saline- or L-NAME-treated rats on GD 18.5. Eighteen images on the right show immunohistochemistry staining of placental tissues using antibodies against FOXP1, TET3, and DUSP5. Magnification, 20x; Scale bar, 100  $\mu$ m. The abundance of FOXP1, TET3, and DUSP5 protein was detected by immunohistochemistry

Supplemental file 8: EDITORIAL CERTIFICATE.

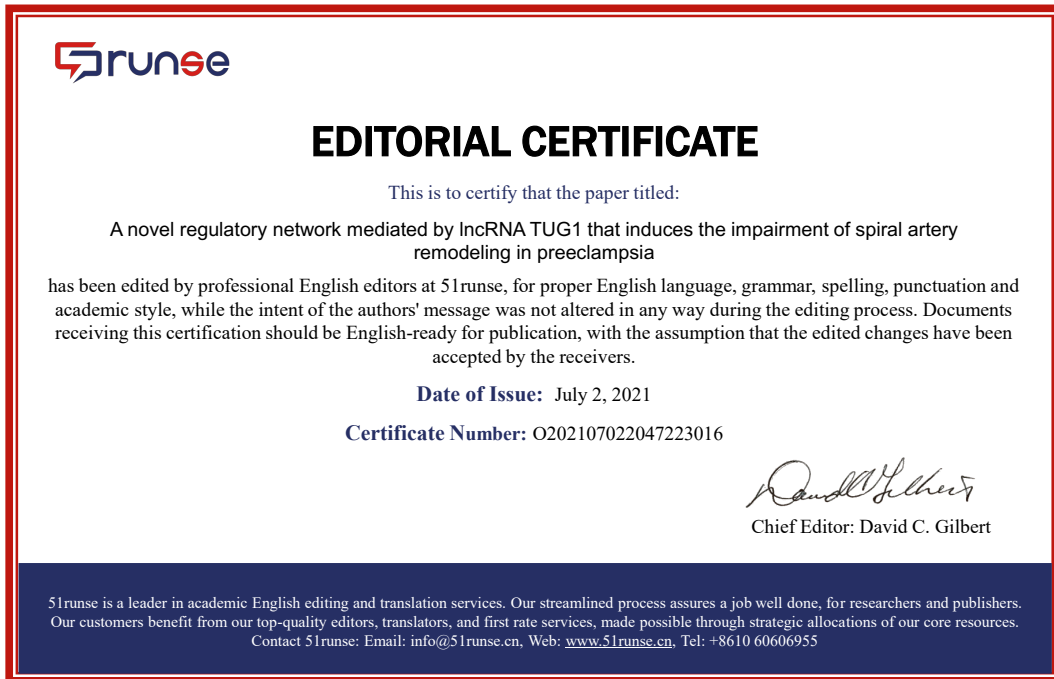

Supplemental file 9: Detailed process of RNA pulldown assays.

### RNA pulldown assay

#### 1. Plasmid templates Linearization

**Prepare reagent supplies:** Sense RNA Plasmid、Antisense RNA Plasmid、Restriction Enzyme Digestion、Ultrapure water、Buffer

1. Thaw the frozen reagents

2. Assemble transcription reaction at room temp

| Component                    | Amount        |
|------------------------------|---------------|
| Ultrapure water              | to 50 $\mu$ L |
| Buffer                       | 5 $\mu$ L     |
| Plasmid                      | 1 $\mu$ g     |
| Restriction Enzyme Digestion | 1 $\mu$ L     |

3. Mix thoroughly, Incubate at 37°C, 2 hr

4. Agarose gel electrophoresis confirmed adequate digestion

5. Expand the optimized reaction system

6. Heat inactivation 65°C for 20 min

7. Proteinase K、0.5% SDS for 30 min at 50°C, follow this with phenol/chloroform extraction (using an equal volume).
8. 2 volumes of ethanol precipitation. Mix well and chill at –20°C for at least 15 min.
9. Then pellet the DNA for 15 min in a microcentrifuge at top speed. Remove the supernatant, Resuspend in dH2O or TE buffer at a concentration of 0.5–1 µg/µL.

## 2. RNA Transcription in Vitro

**Prepare reagent supplies:** mMESSAGE mMACHINE® Kit AM1344、DNA template、EP tube

### 1. Thaw the frozen reagents

Place the RNA Polymerase Enzyme Mix on ice, it is stored in glycerol and will not

be frozen at –20°C.

Vortex the 10X Reaction Buffer and the 2X NTP/CAP until they are completely in solution. Once thawed, store the ribonucleotides (2X NTP/CAP) on ice, but keep the 10X Reaction Buffer at room temperature while assembling the reaction.

All reagents should be microfuged briefly before opening to prevent loss and/or contamination of material that may be present around the rim of the tube.

### 2. Assemble transcription reaction at room temp

The following amounts are for a single 20 µL reaction. Reactions may be scaled up

or down if desired

| <b>Component</b>                           | <b>Amount</b> |
|--------------------------------------------|---------------|
| Nuclease-free Water                        | to 20 µL      |
| 2X NTP/CAP                                 | 10 µL         |
| 10X Reaction Buffer                        | 2 µL          |
| (optional) [ $\alpha$ -32P]UTP as a tracer | (1 µL)        |
| linear template DNA†                       | 0.1–1 µg      |
| Enzyme Mix                                 | 2 µL          |

### 3. Mix thoroughly



Gently flick the tube or pipette the mixture up and down gently , and then microfuge tube briefly to collect the reaction mixture at the bottom of the tube.

4. Incubate at 37°C, 2 hr

Typically, 80% yield is achieved after a 1 hr incubation. For maximum yield, we recommend a 2 hr incubation. Since SP6 reactions are somewhat slower than T3 and T7 reactions, they especially may benefit from the second hour of incubation.

5. (optional) Add 1 µL TURBO DNase, mix well and incubate 15 min at 37°C

This DNase treatment removes the template DNA. For many applications it may not be necessary because the template DNA will be present at a very low concentration relative to the RNA.

a. Add 1 µL TURBO DNase, and mix well.

b. Incubate at 37°C for 15 min.

### 3. Purification for RNA Transcription Reactions

**Prepare reagent supplies:** MEGAclean™ Kit AM1908

1. Bring the RNA sample to 100 µL with Elution Solution. Mix gently but thoroughly

2. Add 350 µL of Binding Solution Concentrate to the sample. Mix gently by pipetting.

3. Add 250 µL of 100% ethanol to the sample. Mix gently by pipetting.

4. Pipet the RNA mixture onto the Filter Cartridge. Centrifuge for ~15 sec to 1 min, or until the mixture has passed through the filter. Centrifuge at RCF 10,000–15,000 × g (typically 10,000–14,000 rpm).

5. Wash with 2 × 500 µL Wash Solution.

6. Elute RNA from the filter with 50 µL Elution Solution using one of the methods

described below; they are equivalent in terms of RNA recovery.

a. Pre-heat 110 µL of Elution Solution per sample to 95° C.

b. Apply 50 µL of the pre-heated Elution Solution to the center of the Filter Cartridge, close the cap of the tube and centrifuge for 1 min at room temperature (RCF 10,000–15,000 × g) to elute the RNA.

c. To maximize RNA recovery , repeat this elution procedure with a second pre-

heated 50  $\mu$ L aliquot of Elution Solution. Collect the eluate into the same Collection/Elution Tube.

7. (optional) Precipitate with 5 M Ammonium Acetate. To concentrate the RNA, precipitate as follows:

a. Add 1:10 volume of 5 M Ammonium Acetate (NH<sub>4</sub>Ac) to the purified RNA.

Note: If the sample was eluted with 100  $\mu$ L Elution Solution as suggested,

this will be 10  $\mu$ L of 5 M NH<sub>4</sub>Ac.

b. Add 2.5 volumes of 100% ethanol (275  $\mu$ L if the RNA was eluted in 100  $\mu$ L).

Mix well and incubate at  $-20^{\circ}\text{C}$  for 30 min.

c. Microcentrifuge at top speed for 15 min at  $4^{\circ}\text{C}$  or room temperature (RT).

d. Carefully remove and discard the supernatant.

e. Wash the pellet with 500  $\mu$ L 70% cold ethanol, centrifuge again and remove

the 70% ethanol.

f. To remove the last traces of ethanol, quickly re-spin the tube, and aspirate any residual fluid with a very fine tipped pipette, or with a syringe needle.

g. Air dry the pellet. Resuspend the pellet using the desired solution and volume.

#### 4. Pierce RNA 3' End Desthiobiotinylation

**Prepare reagent supplies:** Pierce RNA 3' End Desthiobiotinylation Kit, 1-50pmol of RNA for labeling, Heated mixer/chiller for incubation at  $37^{\circ}\text{C}/16^{\circ}\text{C}$ , Chloroform:isoamyl alcohol (24:1), Nuclease-free pipette tips and tubes, 5M NaCl, Ultrapure water, 100% ethanol, ice-cold, 70% ethanol, ice-cold

1. Thaw all kit components except the PEG 30% and DMSO on ice. Thaw DMSO at room temperature and warm the PEG 30% at  $37^{\circ}\text{C}$  for 5-10 minutes until volume is fluid.

2. Adjust the heating block to  $85^{\circ}\text{C}$ .

3. Transfer 5 $\mu$ L of the Non-labeled RNA Control to a microcentrifuge tube. Heat the RNA for 3-5 minutes at  $85^{\circ}\text{C}$ . Place RNA immediately on ice.

**Note:** The RNA may require heating to relax the secondary structure. Also, heating the RNA in the presence of ~25% DMSO may increase efficiency for RNA with significant secondary structure.

4. Prepare the labeling reaction for the control system or test RNA by adding components in the order listed in Table 1.

**Note:** The last added reagent is PEG 30%. Carefully pipette the PEG 30% into the reaction mixture. Use a new pipette tip to mix the ligation reaction after the PEG 30% addition.

| <b>Component</b>                    | <b>Volume (μL)</b> | <b>Final Concentration</b> |
|-------------------------------------|--------------------|----------------------------|
| Nuclease-free Water                 | 3                  | ---                        |
| 10X RNA Ligase Reaction Buffer      | 3                  | 1X                         |
| RNase Inhibitor                     | 1                  | 40U                        |
| Non-labeled RNA Control or Test RNA | 5                  | 50pmol                     |
| Biotinylated Cytidine Bisphosphate  | 1                  | 1nmol                      |
| T4 RNA Ligase                       | 2                  | 40U                        |
| PEG 30%                             | 15                 | 15%                        |
| <b>Total</b>                        | <b>30</b>          | ---                        |

5. Incubate the reactions at 16°C for 2 hours for the control RNA. Ligation may require overnight incubation to increase efficiency.
6. Add 70μL of nuclease-free water to the ligation reaction.
7. Add 100μL of chloroform:isoamyl alcohol to each reaction to extract the RNA ligase. Vortex the mixture briefly, then centrifuge 2-3 minutes at high speed in a microcentrifuge to separate the phases. Carefully remove the top (aqueous) phase and transfer to a nuclease-free tube.
8. Add 10μL of 5M NaCl, 1μL of glycogen and 300μL of ice-cold 100% ethanol. Precipitate for ≥ 1 hour at -20°C.
9. Centrifuge at ≥ 13,000 × g for 15 minutes at 4°C. Carefully remove the supernatant, taking care not to disturb the pellet.
10. Wash the pellet with 300μL of ice-cold 70% ethanol. Carefully remove ethanol and air-dry the pellet (~5 minutes).
11. Resuspend the pellet in 20μL of nuclease-free water or buffer of choice.

## 5. Pierce Magnetic RNA-Protein Pull-Down

**Prepare reagent supplies:** Pierce Magnetic RNA-Protein Pull-Down Kit, Target RNA for labeling, Chloroform:isoamyl alcohol (24:1), Ethanol, absolute, Cell Lysis Buffer (for preparation of cell lysate), Magnetic separation stand

### A. Pre-Washing Streptavidin Magnetic Beads (Optional)

1. Resuspend the beads in the original vial by gentle swirling or rotation.
2. Remove the amount to be treated and transfer to a nuclease-free tube.
3. Place tube on a magnetic stand to collect the beads against the sides of the tube.
4. Wash the beads twice with a 2X volume of 0.1M NaOH, 50mM NaCl (nuclease-free).
5. Wash the beads once in 100mM NaCl.
6. Continue with equilibration of magnetic beads for RNA capture (Section D).

### B. Preparation of Cell Lysate

1. Cell lysates may be prepared using standard lysis buffers
2. Ensure the cell lysate protein concentration is greater than 2mg/mL, such that there is significant dilution into the Binding Reaction Buffer.

### C. Binding of Labeled RNA to Streptavidin Magnetic Beads

**Note:** Use a range of 25-100pmol of RNA per 20-50 $\mu$ L of magnetic beads. The instructions below use a scale of 50pmol of RNA to 50 $\mu$ L of beads.

1. Add 50 $\mu$ L of streptavidin magnetic beads to a 1.5mL microcentrifuge tube.
2. Place the tube into a magnetic stand to collect the beads against the side of the tube. Remove and discard the supernatant.
3. Wash with an equal volume of 20mM Tris (pH 7.5). Resuspend beads by pipetting or vortexing.
4. Repeat Steps 2 and 3.
5. Place the tube into a magnetic stand to collect the beads against the side of the tube. Remove and discard the supernatant.
6. Add an equal volume of 1X RNA Capture Buffer. Resuspend beads by pipetting or vortexing.
7. Add 50pmol of labeled RNA to the beads. Mix gently by pipetting.
8. Incubate for 15-30 minutes at room temperature with agitation.

#### D. Binding of RNA-Binding Proteins to RNA

1. Place the tube into a magnetic stand to collect the beads against the side of the tube. Remove and discard the supernatant.
2. Wash with an equal volume of 20mM Tris (pH 7.5). Resuspend beads by pipetting or vortexing.
3. Repeat Steps 1 and 2.
4. Place the tube into a magnetic stand to collect the beads against the side of the tube. Remove and discard the supernatant.
5. Dilute 10X Protein-RNA Binding Buffer to 1X (i.e., 10 $\mu$ L into 90 $\mu$ L of ultrapure water for each reaction).
6. Add 100 $\mu$ L of 1X Protein-RNA Binding Buffer to the beads and mix well.
7. Prepare a Master Mix of RNA-Protein Binding Reaction (Table 2).

| Reagent                         | Volume ( $\mu$ L) per 100 $\mu$ L reaction for control | Range          |
|---------------------------------|--------------------------------------------------------|----------------|
| 10X Protein-RNA Binding Buffer  | 10                                                     | 5-20 $\mu$ L   |
| 50% glycerol                    | 30                                                     | 0-50 $\mu$ L   |
| Lysate (protein conc. > 2mg/mL) | 1-30                                                   | 20-200 $\mu$ g |
| Nuclease-free water             | to 100                                                 | to 100 $\mu$ L |

8. Place the tube into a magnetic stand to collect the beads against the side of the tube. Remove and discard the supernatant.
9. Add 100 $\mu$ L of Master Mix to the RNA-bound beads. Mix by pipetting or gentle vortexing.
10. Incubate 30-60 minutes at 4°C with agitation or rotation.

#### E. Washing and Elution of RNA-Binding Protein Complexes

1. Place the tube into a magnetic stand to collect the beads against the side of the tube. Transfer the supernatant to a tube for later analysis.
2. Wash with equal volume of 1X wash buffer (100 $\mu$ L).
3. Repeat Steps 1 and 2 two additional times. Save wash supernatants for analysis, if desired.
4. Place the tube into a magnetic stand to collect the beads against the side of the tube. Transfer the supernatant to a tube for later analysis.
5. Add 50 $\mu$ L of Elution Buffer to the beads and mix well by vortexing. Incubate 15-30 minutes at 37°C with agitation.
6. Place the tube into a magnetic stand to collect the beads against the side of the tube.
7. Remove supernatant for downstream analysis.

8. If the downstream application is Western blotting, add reducing sample buffer to samples to 1X.

#### F. Western Blot Analysis

Supplemental table 1: The detailed clinicopathological features of normal pregnancy and preeclampsia

#### Clinical characteristics of preeclamptic and normal pregnancies.

| Variable                         | PE (N=64)         | Normal (N=64)   | <i>P</i> value <sup>a</sup> Normal vs P |
|----------------------------------|-------------------|-----------------|-----------------------------------------|
| Maternal age (year)              | 32±4.95375        | 34.2968±3.5307  | p>0.05                                  |
| Maternal weight (kg)             | 76.226±11.1376    | 74.0703±8.0602  | p>0.05                                  |
| Smoking                          | 1                 | 0               | p>0.05                                  |
| Systolic blood pressure (mm Hg)  | 162.6718±14.9443  | 116.1406±7.9758 | p<0.01                                  |
| Diastolic blood pressure (mm Hg) | 105.9687±10.8173  | 71.5843±8.6279  | p<0.01                                  |
| Proteinuria (g/day)              | >0.3g             | <0.3g           | p<0.05                                  |
| Body weight of infant (g)        | 2291.9375±9089.06 | 3385.15±364.243 | p<0.05                                  |
| Gestational age (week)           | 34.06±3.231       | 38.375±0.9677   | p<0.05                                  |

Supplemental table 2: Related antibody information and description.

| Gene    | Antibody       | Concentration  | Volume | Incubation Time               | Wash    |                         |                      |                                                      |
|---------|----------------|----------------|--------|-------------------------------|---------|-------------------------|----------------------|------------------------------------------------------|
| GAPDH   | 5% nonfat milk | 5% nonfat milk | 1:2000 | CMC TAG, AT0002               | 5% milk | Anti-Rabbit IgG, 1:3000 | 0.22um 250mA, 90min  |                                                      |
| FOXP1   | 5% nonfat milk | 5% nonfat milk | 1:750  | PROTEINTECH GROUP, 22051-1-AP | 5% milk | Anti-Rabbit IgG, 1:3000 | 0.22um 250mA, 100min | Wash 3 times after 1st and 2nd Abs, 10 min each time |
| TET3    | 5% nonfat milk | 5% nonfat milk | 1:500  | GENE Tex 121453               | 5% milk | Anti-Rabbit IgG, 1:3000 | 0.22um 250mA, 120min | Wash 3 times after 1st and 2nd Abs, 5 min each time  |
| DUSP2   | 5% nonfat milk | 5% nonfat milk | 1:750  | PROTEINTECH GROUP, 27327-1-AP | 5% milk | Anti-Rabbit IgG, 1:3000 | 0.22um 250mA, 90min  | Wash 3 times after 1st and 2nd Abs, 5 min each time  |
| DUSP4   | 5% nonfat milk | 5% nonfat milk | 1:750  | PROTEINTECH GROUP, 66349-1-Ig | 5% milk | Anti-Mouse IgG 1:3000   | 0.22um 250mA, 90min  | Wash 3 times after 1st and 2nd Abs, 5 min each time  |
| DUSP5   | 5% nonfat milk | 5% nonfat milk | 1:500  | abcam ab 200708               | 5% milk | Anti-Rabbit IgG, 1:3000 | 0.22um 250mA, 90min  | Wash 3 times after 1st and 2nd Abs, 5 min each time  |
| foxp2   | 5% nonfat milk | 5% nonfat milk | 1:750  | PROTEINTECH GROUP, 20529-1-AP | 5% milk | Anti-Rabbit IgG, 1:3000 | 0.22um 250mA, 100min | Wash 3 times after 1st and 2nd Abs, 5 min each time  |
| TET1    | 5% nonfat milk | 5% nonfat milk | 1:500  | abcam ab 191698               | 5% milk | Anti-Rabbit IgG, 1:3000 | 0.22um 250mA, 120min | Wash 3 times after 1st and 2nd Abs, 5 min each time  |
| SUV39H1 | 5% nonfat milk | 5% nonfat milk | 1:500  | abcam ab 12045                | 5% milk | Anti-Mouse IgG 1:3000   | 0.22um 250mA, 100min | Wash 3 times after 1st and 2nd Abs, 5 min each time  |

Supplemental table 3: Bioinformatics analysis (<http://bibiserv.techfak.uni-bielefeld.de/mahybrid/>) predicted the binding sites of miR-218 in the 3'-UTR of FOXP1

| miRNA          | MIMATid   | Gene  | -Y | EntrezID | RefseqID     | mirWalk | Microt4 | miRanda | mirbridge | miRDB | miRMap | miRMAP |
|----------------|-----------|-------|----|----------|--------------|---------|---------|---------|-----------|-------|--------|--------|
| hsa-miR-218-5p | MIMAT0000 | FOXP1 |    | 27086    | NM_001244808 | 1       | 1       | 0       | 0         | 0     | 1      | 0      |
| hsa-miR-218-5p | MIMAT0000 | FOXP1 |    | 27086    | NM_032682    | 1       | 0       | 0       | 0         | 0     | 1      | 0      |
| hsa-miR-218-5p | MIMAT0000 | FOXP1 |    | 27086    | XM_005264740 | 1       | 0       | 0       | 0         | 0     | 1      | 0      |
| hsa-miR-218-5p | MIMAT0000 | FOXP1 |    | 27086    | XM_005264742 | 1       | 0       | 0       | 0         | 0     | 1      | 0      |
| hsa-miR-218-5p | MIMAT0000 | FOXP1 |    | 27086    | NM_001244813 | 1       | 0       | 0       | 0         | 0     | 1      | 0      |
| hsa-miR-218-5p | MIMAT0000 | FOXP1 |    | 27086    | XM_005264731 | 1       | 0       | 0       | 0         | 0     | 1      | 0      |
| hsa-miR-218-5p | MIMAT0000 | FOXP1 |    | 27086    | NM_001244812 | 1       | 0       | 0       | 0         | 0     | 1      | 0      |
| hsa-miR-218-5p | MIMAT0000 | FOXP1 |    | 27086    | XM_005264739 | 1       | 0       | 0       | 0         | 0     | 1      | 0      |
| hsa-miR-218-5p | MIMAT0000 | FOXP1 |    | 27086    | XM_005264741 | 1       | 0       | 0       | 0         | 0     | 1      | 0      |
| hsa-miR-218-5p | MIMAT0000 | FOXP1 |    | 27086    | XM_005264735 | 1       | 0       | 0       | 0         | 0     | 1      | 0      |
| hsa-miR-218-5p | MIMAT0000 | FOXP1 |    | 27086    | XM_005264736 | 1       | 0       | 0       | 0         | 0     | 1      | 0      |
| hsa-miR-218-5p | MIMAT0000 | FOXP1 |    | 27086    | XM_005264733 | 1       | 0       | 0       | 0         | 0     | 1      | 0      |
| hsa-miR-218-5p | MIMAT0000 | FOXP1 |    | 27086    | NM_001244815 | 1       | 0       | 0       | 0         | 0     | 1      | 0      |
| hsa-miR-218-5p | MIMAT0000 | FOXP1 |    | 27086    | NM_001244814 | 1       | 0       | 0       | 0         | 0     | 1      | 0      |
| hsa-miR-218-5p | MIMAT0000 | FOXP1 |    | 27086    | NM_001244816 | 1       | 0       | 0       | 0         | 0     | 1      | 0      |
| hsa-miR-218-5p | MIMAT0000 | FOXP1 |    | 27086    | XM_005264737 | 1       | 0       | 0       | 0         | 0     | 1      | 0      |
| hsa-miR-218-5p | MIMAT0000 | FOXP1 |    | 27086    | XM_005264738 | 1       | 0       | 0       | 0         | 0     | 1      | 0      |
| hsa-miR-218-5p | MIMAT0000 | FOXP1 |    | 27086    | XM_005264732 | 1       | 0       | 0       | 0         | 0     | 1      | 0      |
| hsa-miR-218-5p | MIMAT0000 | FOXP1 |    | 27086    | XM_005264729 | 1       | 0       | 0       | 0         | 0     | 1      | 0      |
| hsa-miR-218-5p | MIMAT0000 | FOXP1 |    | 27086    | XM_005264734 | 1       | 0       | 0       | 0         | 0     | 1      | 0      |
| hsa-miR-218-5p | MIMAT0000 | FOXP1 |    | 27086    | NM_001244810 | 1       | 0       | 0       | 0         | 0     | 1      | 0      |
| hsa-miR-218-5p | MIMAT0000 | FOXP1 |    | 27086    | XM_005264730 | 1       | 0       | 0       | 0         | 0     | 1      | 0      |
| hsa-miR-218-5p | MIMAT0000 | FOXP1 |    | 27086    | NM_001012505 | 0       | 0       | 0       | 0         | 0     | 1      | 0      |

Supplemental table 4: Target\_Primer in methyltarget sequencing.

| Target   | Chr   | Gene  | mRNA       | mRNA Strand | TSS          | TES          | Start        | End          | Length | Target Strand | Distance2TSS | PrimerF                         |
|----------|-------|-------|------------|-------------|--------------|--------------|--------------|--------------|--------|---------------|--------------|---------------------------------|
| DUSP2_04 | chr2  | DUSP2 | NM_004418  | -           | 9614<br>5440 | 9614<br>3168 | 9614<br>5482 | 9614<br>5675 | 194    | +             | -42          | GGTTTTYGGGGTAT<br>ATATAAGGGTAGA |
| DUSP4_18 | chr8  | DUSP4 | NM_0057158 | -           | 2934<br>8805 | 2933<br>3061 | 2934<br>8363 | 2934<br>8097 | 267    | -             | 442          | TTGAGYGGGGTTAG<br>TTTTGGTTA     |
| DUSP5_21 | chr10 | DUSP5 | NM_004419  | +           | 1.1E+08      | 1.11E+08     | 1.1E+08      | 1.1E+08      | 259    | +             | -100         | GTTYGAGGGGYGGC<br>AAATA         |

## Supplemental table 5: Pyrosequencing related primer data.

### 1. DUSP2



Genomic regions, transcripts, and products

Go to [reference sequence](#)

Genomic Sequence: NC\_000002.12 Chromosome 2 Reference GRCh38.p13 Primary Assembly

Go to nucleotide: [Graphics](#) [FASTA](#) [Gen](#)



mRNA `join(1..708,1096..1315,1432..2303)`  
`/transcript_id="XM\_017003546.1"`  
`/db_xref="GeneID:1844"`

CDS `join(115..708,1096..1315,1432..1646)`  
`/gene="DUSP2"`  
`/gene synonym="PAC-1; PAC1"`  
`/protein id="XP_016859035.1"`  
`/db_xref="GeneID:1844"`  
`/db_xref="HGNC:HGNC:3068"`  
`/db_xref="MIM:603068"`

ORIGIN

```
1 ttaaccCGgg cCGcCGCGga gggCGccCGg agtCGacCGc tCGggcagCG
ccacCGccac
61 gagagccCGg gaCGCGggaa agacCGaaag gaagaggaag aggcacCGgt
ggccatgggg
```

NOTES: -2000bp+5 'UTR+some CDSsequences (ATG are marked in green), and methylation islands are marked with horizontal lines

## Homo sapiens chromosome 2, GRCh38.p13

### Primary Assembly

NCBI Reference Sequence: NC\_000002.12

[GenBank Graphics](#)

>NC\_000002.12:c96147468-96143166 Homo sapiens chromosome 2, GRCh38.p13 Primary Assembly



CCCCACATGCAGAACTCCC**CG**GCAAGGTATACCAGATTCTCCAGAAGGAGGGGAAGAGGCCAGCCAG  
CATGGGAGTTGGGTCTGGAGCCCCTTACA**CG**GCTGAGCTGAATTCACCTCCTGAATCAGGGATCCCACCT  
GGCTGGGGTCTCCACAGAGCTGGAAGGCTTTGGCTCCTGGCCCAGCAGCAAGACTGGACCTGATTGT  
CCTTCTGCA**CG**CTCTGTAATTTGCCCTGGAATAAGCATTAAGTCATTTGGAGGC**CG**ATGCCAAAGATA  
AGGGCTCATATCAGCCTTTGGGATCTGTGGCCAGACTCCCTGGCTCTGTTGTGGGCTTTGCTGCCTCA  
GCCTCCAGACTGGCCTGCCAGGGACAG**CG**GGGCTCAGCCAAGTTGCCCAGACAGTGGAGTAGCCTTAG  
AG**CG**TTGGAGCCAGTGTGGAAGAGC**CG**CTGCACCATGATGTGCTCCCTTACAGATGGAGACACTGAGA  
GGGTGACGTGGCCCCAGGGACCTTTGGAGTCTTTGGGGCTTTTCTCCTCTGCAT**CG**GCTCTGACCCAG  
CACACACAAGCTCCAGCTCCTTCTCACACATAGTGGAACTGCACAGGTA**CG**ATGCTGCCCTGCACACAA  
CCAGGCATACAGCACACTGCTGTGAGGAACTCAGGGCAGACAAGTCCAGAAGGGCT**CG**GGCTCTCCAC  
AGGTCCCAGCTGTCACTCTTCAAGA**CG**GTCTGGACACAGGGGTCTGTGGGGGAGC**CG**GAAGGGTCTTTC  
AGAGGGCA**CG**GAGGAGGGCCTCAGGAGACTGGGGCTTGAGGGTGGTTCTGAAATCCCA**CG**CAGCTG  
GGGGCAGGG**CG**AGGGCAGCTCCAG**CG**CAGTGA**CG**CTGTCTCCACCCACCTCAACTTCTCTGCTTGAGTT  
TGGGAGTTCACTGCCAACAAATTTCTGTGGCTCAGACACCCCA**CG**CACACCTGGGCCCTACCACATC**CG**G  
CAGCAGGGCTGGGGGAGGG**CG**GAATGGAGGGGATACCCAGGCCCCAGTCTC**CG**GGTGCAGTGCCTAGC  
CCTGGACTTTGCTGCC**CG**CGGGGCTGGACAGGGAGGCCTAGGATGGGGGAGGCCAGTTCTGTTCTGCT  
TCTCCCTCTTCCCTTGCCAAGGTCTTGAATCC**CG**CAGGCTGGGGAGGGC**CG**GGAG**CG**TCAG**CG**GA  
CTTCCCTCCAGGG**CG**GGCTTGTGGCAGGGGGAAGTACTTCTCTCTGGGGCTGGGGGCTTTCCCTGCAC  
CCAGGAGGAAGAAGCTTTGCCCTACACATAACTGGAAACCAGTACAGACCCCTGCTTTCCCATGAAA  
GGCCCTGGGACCCCCCTCATTTCCCTT**CG**GCCAAGCCCAGGGCCTGGGCC**CG**GGGACTGTGTTCT  
GGCCTAGCTTGGCCACCAACCTACTGCAAGACCCTGAGTACTGGTCTTATCCAGGCAATGGGGGGTGGG  
GAGGGGAGGAGAGAGAAAGTCCCTCTGGCTCAAGGTCTCCAAATAGATGAGAAATAGGACATCTCAGC  
AGGGACCCCCCATCATCCAGTGTAGAAATCACC**CG**TGGCAGCAGGCATTTGTCAATGTTTGTGGTGA  
CAAATTTCTAAGAGGAAAATCTGGGAGGGAAAAGGAAAAGGCAGAGGAAG**CG**TGGGGTTAGGGGTGG  
GGTACTCCAAGGGTCAT**CG**TTGGCCCTAAAGGGGGACCTGCATCTGAGAAGCTGGGTTCGCCAGGACTG  
AGTGGCTTGGGACAGGTCAAAGGGTGGG**CG**CAAAA**CG**GAGGGGTGCTAGTCCCTC**CG**ACTC**CG**GGTAA  
CACCTTCCCTTCCCTTAGT**CG**CTGGTCC**CG**CCTCCTC**CG**GTGTGTTGGTCC**CG**CGC**CG**CCCTGCCTTC  
CCCCTCAACCTCCCCC**CG**CCC**CG**AAGTCTCCAGGTCAGCCCAGACTG**CG**CCCCA**CG**TGAGGGG**CG**GG  
**CG**CGGG**CG**CGGG**CG**CCAG**CG**CCTTCTGCTCTGCCCTTGTATGGTGGCC**CG**GAGGC**CG**GCCCA**CG**GGT  
ACTTAACC**CG**GGC**CG**CGCGGAGGG**CG**CC**CG**GAGT**CG**AC**CG**CT**CG**GGCAG**CG**CCAC**CG**CCA**CG**AGAGCC  
**CG**GGAA**CG**CGGGAAAGAC**CG**AAAGGAAGAGGAAGAGGCAC**CG**GTGGCC**AT**CGGGCTGGAGG**CG**CGCGCG  
AGCTGGAGTG**CG**CGG**CG**CTGGGCA**CG**CTGCTG**CG**GGATC**CG**CGGGAGG**CG**GAA**CG**CA**CG**CTGCTGCTGG  
ACTGC**CG**CCCCCTTCTGGCCTTCTGC**CG**CGCCACGTG**CG**CG**CG**CGCGGCCAGTGCCTTGGA**CG**CGC  
TGCTG**CG**CG**CG**CGCGCGCGGCCCTCCTGC**CG**CGTTCT**CG**CCTGCCTGCTGCC**CG**AC**CG**CGCGCTGC  
GGA**CG**CGCCTGGTC**CG**CGGGGAGCTGG**CG**CGGGC**CG**TGGTGTGGAA**CG**AGGGCAGTGCCT**CG**GTGG**CG**G  
AGCTC**CG**GCC**CG**ACAGCC**CG**GCTCATGTGCTGCTGGCCG**CG**CTGCTGCA**CG**AGACC**CG**CGCGGGGCCCA  
CTGC**CG**TGTACTTCTTG**CG**AGGTGAGCAAGC**CG**GC**CG**CCCTTGGCC**CG**CCCCACC**CG**ACTCCAGCC**CG**G  
CTTTCCCTGCTGAT**CG**TGCTCTTCCCTCCTTGCAGGAGGCTT**CG**A**CG**GTTCAGGGCTGCTGTCC**CG**  
ATCTGTGCTCTGAGGCCCC**CG**CCCCTG**CG**CTGC**CG**CAACAGGGGACAAAACCAGC**CG**CTC**CG**ACTCCA  
GGGCTCCTGTCTA**CG**ACCAGGTGAGTATTGACCCCCCTCCC**CG**AACCTCCCTCTCTCCC**CG**CGCGGA  
CTGGG**CG**CCTCTAGGGAAAGAGCCTGCCATTTGGGGATG**CG**AGCAGTTTGGCCATATACACACTTTT  
ATA**CG**TGTGTGTTGGGGAGGGGTGGGGCATGGCTGCT**CG**CGCGTGCCTGTATGGGTCTGTGTATG  
TTTGCATGTGTATGTTGGGAGCATGAAGGGAAAATGTATGTCC**CG**GTGTGTCCTC**CG**CACATTCCTGAGA

CCTGTCTCAGGTCAGGAGGACTGGCTGAGGAGTCTCTTGTCTCGGCCAGCCCATGGGGTCTCCACCCG  
 CTGCTGCTCCAGCTCTCCGGGGCTGGGCTGGAAAGCCTCACGCC

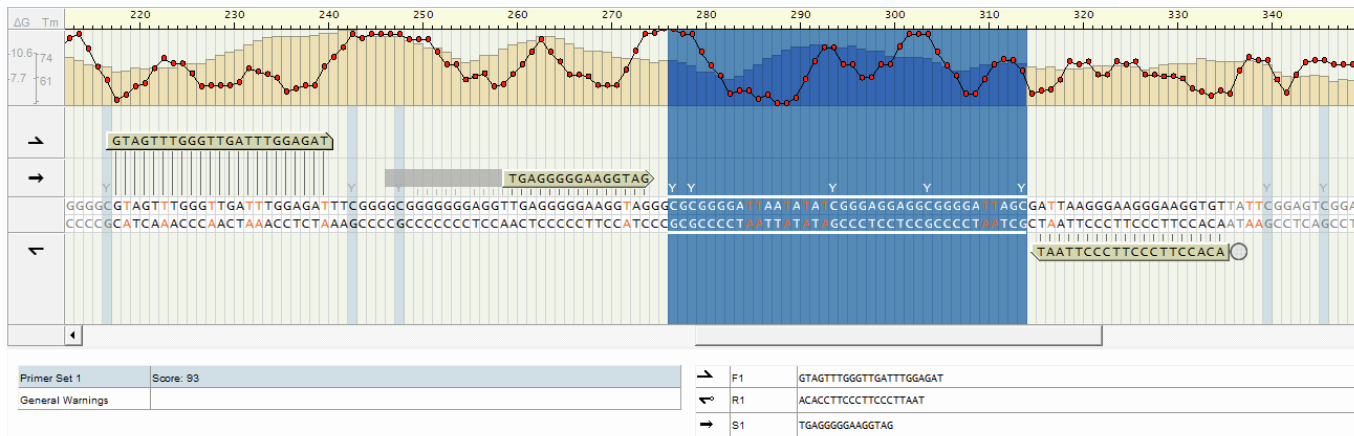

|                  |           |
|------------------|-----------|
| Primer Set 1     | Score: 93 |
| General Warnings |           |

|    |                        |
|----|------------------------|
| F1 | GTAGTTTGGGTTGATTGGAGAT |
| R1 | ACACCTTCCCTTCCCTTAAT   |
| S1 | TGAGGGGAAGGTAG         |

|                     | PCR Product                                                           | Forward PCR Primer, F1 | Reverse PCR Primer, R1 | Sequencing Primer, S1 |
|---------------------|-----------------------------------------------------------------------|------------------------|------------------------|-----------------------|
| Length, nt          | 118                                                                   | 23                     | 20                     | 15                    |
| Position, 5'- 3'    |                                                                       | 217 - 239              | 334 - 315              | 259 - 273             |
| Warnings            |                                                                       |                        |                        |                       |
| Tm, °C              |                                                                       | 59.7                   | 61.1                   | 49.1                  |
| %GC                 | 50.8                                                                  | 39.1                   | 45.0                   | 60.0                  |
| Sequence to Analyze | GGYGYGGGA TTAATATATY GGGAGGAGGY GGGATTAGY GATTAAGGGA AGGGAAGGTG TTATT |                        |                        |                       |

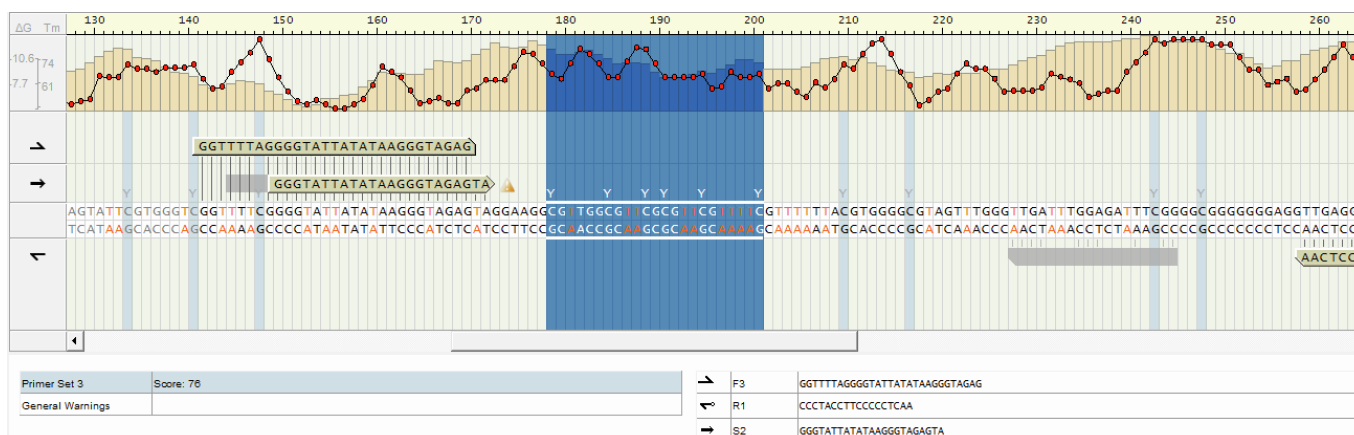

|                  |           |
|------------------|-----------|
| Primer Set 3     | Score: 76 |
| General Warnings |           |

|    |                              |
|----|------------------------------|
| F3 | GGTTTTAGGGTATTATATAAGGGTAGAG |
| R1 | CCCTACCTTCCCCCTCAA           |
| S2 | GGGTATTATATAAGGGTAGAGTA      |

|  | PCR Product | Forward PCR Primer, F3 | Reverse PCR Primer, R1 | Sequencing Primer, S2 |
|--|-------------|------------------------|------------------------|-----------------------|
|--|-------------|------------------------|------------------------|-----------------------|

|                     |                                                 |           |           |                                                                                                                                         |
|---------------------|-------------------------------------------------|-----------|-----------|-----------------------------------------------------------------------------------------------------------------------------------------|
| Length, nt          | 135                                             | 29        | 18        | 23                                                                                                                                      |
| Position, 5'- 3'    |                                                 | 141 - 169 | 275 - 258 | 149 - 171                                                                                                                               |
| Warnings            |                                                 |           |           |  A homopolymer is detected adjacent to polymorphisms |
| Tm, °C              |                                                 | 58.8      | 58.7      | 45.9                                                                                                                                    |
| %GC                 | 45.2                                            | 37.9      | 61.1      | 34.8                                                                                                                                    |
| Sequence to Analyze | GGAAGGYGTT GGYGTTYGYG TTYGTTTTYG TTTTTAYGT GGGG |           |           |                                                                                                                                         |

## 2. DUSP4

|                     |                   |                                                 |   |                                               |
|---------------------|-------------------|-------------------------------------------------|---|-----------------------------------------------|
| 109.20190607        | current           | GRCh38.p13 ( <a href="#">GCF_000001405.39</a> ) | 8 | NC_000008.11 (29333062..29350684, complement) |
| <a href="#">105</a> | previous assembly | GRCh37.p13 ( <a href="#">GCF_000001405.25</a> ) | 8 | NC_000008.10 (29190579..29208267, complement) |

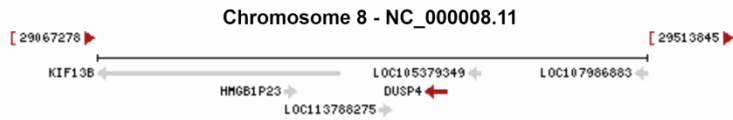

### Genomic regions, transcripts, and products

Go to [reference sequence](#)

Genomic Sequence:

Go to nucleotide: [Graphics](#) [FASTA](#) [GenBank](#)

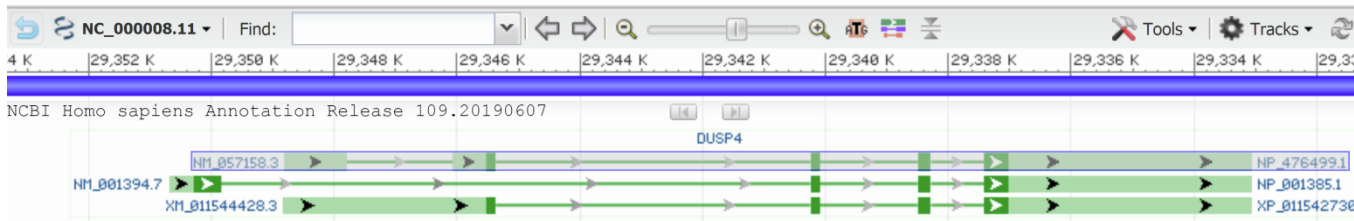

mRNA [join\(1..839,10442..10587,12184..12403,13274..17621\)](#)  
 /gene="DUSP4"  
 /gene synonym="HVH2; MKP-2; MKP2; TYP"  
 /product="dual specificity phosphatase 4,  
 transcript  
 variant 1"  
 /note="Derived by automated computational  
 analysis using  
 gene prediction method: BestRefSeq."  
 /transcript id="NM\_001394.7"  
 CDS  
[join\(407..839,10442..10587,12184..12403,13274..13659\)](#)  
 /gene="DUSP4"  
 /gene synonym="HVH2; MKP-2; MKP2; TYP"  
 /note="isoform 1 is encoded by transcript  
 variant 1;"

Derived by automated computational analysis  
using gene  
prediction method: BestRefSeq."  
/codon start=1  
/product="dual specificity protein phosphatase 4  
isoform  
1"  
/protein id="NP\_001385.1"

1 ctggctgggg cagtgcCGctg agCGcCGgag gagCGtaggc agggcagCGc tggCGccagt  
361 tctcttctct tctcCGCGCG cccagcCGcc tCGgttccCG gCGaccatg tgaCGatgga

## Homo sapiens chromosome 8, GRCh38.p13

### Primary Assembly

NCBI Reference Sequence: NC\_000008.11

[GenBank Graphics](#)

>NC\_000008.11:c29352684-29333062 Homo sapiens chromosome 8,  
GRCh38.p13 Primary Assembly

GGCCACGCCGTGCGGCTTTGACCACTGATCTCCACCCCGGAGTGCCCGACGCCAGGGTCTTGCC  
ACCGGGCAGCCTCGGTCAGTCCACAGTTGTGGCTCCTTCCAGGGCCTGGACTAGGGTGAGCACAAGCCT  
TGAGCGCAACATTTAAGAAGGGCGCGAAAAGTCAGTAATCAAAGAAATATCTTGATGCAATGCCTCT  
TTAAAAGAAAAAATGCAAAAAATCCATGATGAATAAAATACTAAATTTTAAAAGAGAAAGGATCC  
GTGCAGTGCCATCGTAAGCCATTTTGGAGCCCGGAGCAAAAGGAAATATCACCTTGCCCAAGCGGTGCC  
CCTACAGCTCATCCGAGTAGGGCCCGGGGTCGAGGCATTCGGGCCCAGTGGGGGACGAGGCCAGTCG  
AAGGTCTCGGAAGTGAGGCTCCGCGAGCTCCGGTCGGGGAGTGCAGGGATGGCCCCCGGGACCGGAG  
GTGAGAGCTCGGGAAAGCCGCTCCGCCCGGAACAAAGGCATGGGGAGAGGGTGTGCTTGGGCGGGAGA  
GACCCGCGGGTACCGGTGCCCTCGCTGCCTGGGTCGGGCTTCCACGCGCGCCCCGGAATGGAATACCG  
TACTCTGCAGCCTCCGAAACTGCGAGCGAGTCTGTAACTCCCTTGCTCTGTGATTAATTCTCACTAAC  
AAGACTTGGCAAGATGTCGGGCGAATGATTTTGGCTTCTGCACGTCCCACCGCGTCGTGCACAAA  
CCCCCAGCCAAAAGCCGCTCTGGGAAATTTAAATGCAAAAGAGAAATGGGGATGGGGAGGGCTGCTACG  
TGACCAGGAAAAAGGGATGCCAGAAACATGAATCGGACCCAGAGCTGCTGAAGTCCTTTCAAAGGTC  
ATTCTTTGCGGGTACATTTTCCAGGGTCCAGCTCCGCAACAAATGTGGACCCTGTCAATTTCTGAAAGG  
ATAATTACAACATATGCAAGATAGGGTGAAGACGTTTCCCAAACCCGAAAACCTTGTTTTTCCCCCGAC  
CAGGGTTAAATAAACATCTTTTAGGAAGCGTGGACAGGAGCGCAGCCTGCTCTCCTCCCTCGGAACACC  
ATTCCGGCAATTAATGCCTCCCTTTGGGTAGTAAAGCAACAAACCCACACCTCACTCCGATCCTGGGC  
TTCGGGCGGGAGGACTTCTCTTTCATCTTCCAAGCAGGGGTTGCCACGTTCTTGGGGAAGCTATAA  
AACTGATTTAATGGCTTTAGATGAAAATCGATCACGCTAATGCATACGCTAACGTCTCAGGAATCGCAT  
ATTCAGAAAGGACTGGCCGGGCCGAAAAGCGCACGGGGAGTCTGGGGCTAGGAGGTGTCAGGCCCGCTG  
GGTGGGCAGCAGCGCTCCGGTCCCCTCTCCACTTGGGTAACCGGGAAAAACCTACGGGGCTGTCACGCG  
GGGAAGCGCGAAGGTGCCAAGGGATGAAAAGCTCAAACCCGAGCCCTGGCCTCCTCAGCCGGCTATTTCC  
TTTGGCGCGCCCGCCTAGCGGCGGGTGCAGCGCGGCACAGGTGCCGGTGTCGGGCTGGAGGCGCGG  
CGCAGGCTGGGCCCGCGGGTAGACGGCGAAAGCGCCGCGCGCTCCATTACAAAGTCGGGCGCTGCC  
CGCGCTGGCGGGTCGGAGGCCGCCTCCCTCTTCTCTCGGCCTCGTTTTATGAATGGGCCTGAT  
GCGGAGCACCCGCGCCCTGTTTACTCCGCTCTTGTGACGTCGAGTCCCGTGACCGGGAGCCAGCGG

**CGCG**CTCCATTCAAGCTC**CG**GGGAGGGGGTGGGAGGAGGGGCC**CG**GAGGGGG**CG**GGGAGTCAG**CGCG**  
 GGGG**CG**GGGGACAG**CGCG**GGGG**CG**GGGA**CG****CGCG**GGGCC**CG**GAATGGAA**CG**GGG**CG**GGCC**CG**  
 GGGTAGTACCTAG**CG**CCCCCTCCCC**CG**GGAG**CGCG**GAGGAGCATTAAATAAACCTCTAAGC**CG**AGGAGAA  
 AACTCTGGCTGGGGCAGTG**CG**CTGAG**CG****CG**GAGGAG**CG**TAGGCAGGGCAG**CG**CTGG**CG**CCAGTGG**CG**  
 ACAGGAGC**CGCGCG**AC**CG**GCAAAAATAC**CG**GGAGGCC**CG**T**CG**CCGAAAAGAGT**CG**CGGTCTCTCTC  
**G**TAAACACACTCTCTCCAC**CG****CG**CCTCCCCCTC**CG**CTCTG**CG****CG****CG**CC**CG**GTGGG**CG**CC**CG**AGGC  
**CG**CTC**CG**ACTGCTATGTGAC**CG**CGAGGCTG**CG**GGAGGAAGGGACAGGGAAGAAGAGGCTCTCC**CGCG**  
 GAGCCCTTGAGGACCAAGTTTG**CG**GCCACTTCTGCAGG**CG**TCCCTTCTTAGCTCT**CG**CC**CG**CCCCTTTC  
 TGCAGCCTAGG**CG**GCC**CG**GGTCTCTTCTCTTCT**CGCGCG**CCAGC**CG**CCT**CG**GTTC**CGCG**ACC**A**  
**TG**GTG**CG**ATGGAGGAGCTG**CG**GGAGATGGACTGCAGTGTGCTCAAAGGCTGATGAAC**CG**GGAG**CG**AG  
 AATGG**CG****CG****CGCG**GG**CG**GCAG**CG**GCAGCCA**CG**GCACCCTGGGGCTGC**CG**AG**CG****CG**GCAAGTGCCTG  
 CTGCTGGACTGCAGAC**CG**TTCC**CG**CGCACAG**CGCG**GGCTACATCCTAGGTT**CG**GTCAA**CG**T**CG**CTGT  
 AACACCAT**CG**TG**CG****CG****CG**GGCTAAGGGCTC**CG**TGAGCCTGGAGCAGATCCTGCC**CG****CG**AGGAGGAG  
 GTA**CGCG**CC**CG**CTG**CG**CTC**CG**CCCTACT**CG**CGGT**CG**TCAT**CG**TCTACGAC**CG**AG**CG**CAGCC**CGCGCG**  
**G**AGAGCCTC**CGCG**AGGACAGCAC**CG**TGT**CG**CTGGTGGTGCAGG**CG**CTGCGC**CG**CAAC**CG**CGAG**CG**CACC  
**G**ACATCTGCCTGCTCAAAGGTA**CG**AGGGCTC**CG**GG**CG**CTAGCTGGAGT

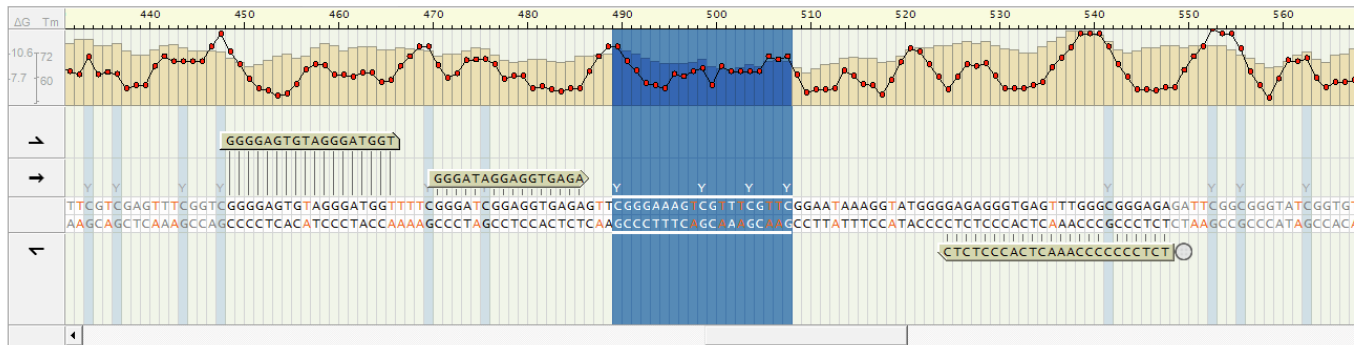

|                  |           |
|------------------|-----------|
| Primer Set 1     | Score: 89 |
| General Warnings |           |

|      |                       |
|------|-----------------------|
| → F1 | GGGGAGTGTAGGGATGGT    |
| ← R1 | TCTCCCCCAAACTCACCTCTC |
| → S1 | GGGATAGGAGGTGAGA      |

|                     | PCR Product                                        | Forward PCR Primer, F1 | Reverse PCR Primer, R1 | Sequencing Primer, S1 |
|---------------------|----------------------------------------------------|------------------------|------------------------|-----------------------|
| Length, nt          | 100                                                | 18                     | 24                     | 16                    |
| Position, 5'- 3'    |                                                    | 448 - 465              | 547 - 524              | 470 - 485             |
| Warnings            |                                                    |                        |                        |                       |
| Tm, °C              |                                                    | 62.1                   | 63.1                   | 42.8                  |
| %GC                 | 49.0                                               | 61.1                   | 62.5                   | 56.3                  |
| Sequence to Analyze | GTTYGGGAAA GTYGTTTYGT TYGGAATAAA GGTATGGGA GAGGGTG |                        |                        |                       |

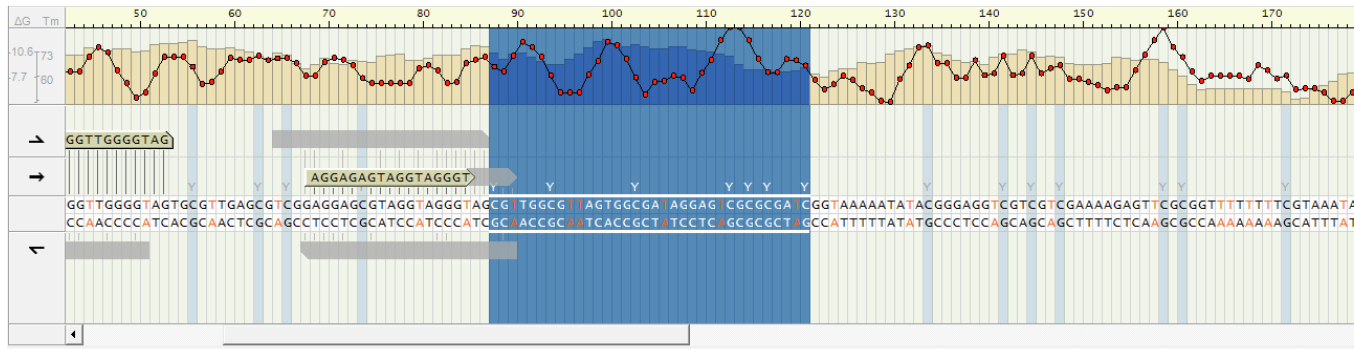

|                  |           |
|------------------|-----------|
| Primer Set 2     | Score: 80 |
| General Warnings |           |

|    |                        |
|----|------------------------|
| F1 | GGAGAAAATTTGGTTGGGGTAG |
| R2 | TCTTCTCCCTATCCCTTCTCTC |
| S2 | AGGAGAGTAGGTAGGGT      |

|                  |           |
|------------------|-----------|
| Primer Set 2     | Score: 80 |
| General Warnings |           |

|    |                        |
|----|------------------------|
| F1 | GGAGAAAATTTGGTTGGGGTAG |
| R2 | TCTTCTCCCTATCCCTTCTCTC |
| S2 | AGGAGAGTAGGTAGGGT      |

|                     | PCR Product                                         | Forward PCR Primer, F1 | Reverse PCR Primer, R2 | Sequencing Primer, S2 |
|---------------------|-----------------------------------------------------|------------------------|------------------------|-----------------------|
| Length, nt          | 267                                                 | 23                     | 23                     | 17                    |
| Position, 5'- 3'    |                                                     | 30 - 52                | 296 - 274              | 68 - 84               |
| Warnings            | Deviation from optimal amplicon size                |                        |                        |                       |
| Tm, °C              |                                                     | 60.8                   | 62.7                   | 46.1                  |
| %GC                 | 36.7                                                | 43.5                   | 52.2                   | 52.9                  |
| Sequence to Analyze | AGYGTGGYG TTAGTGGYGA TAGGAGTYGY GYGATYGGTA AAAATATA |                        |                        |                       |

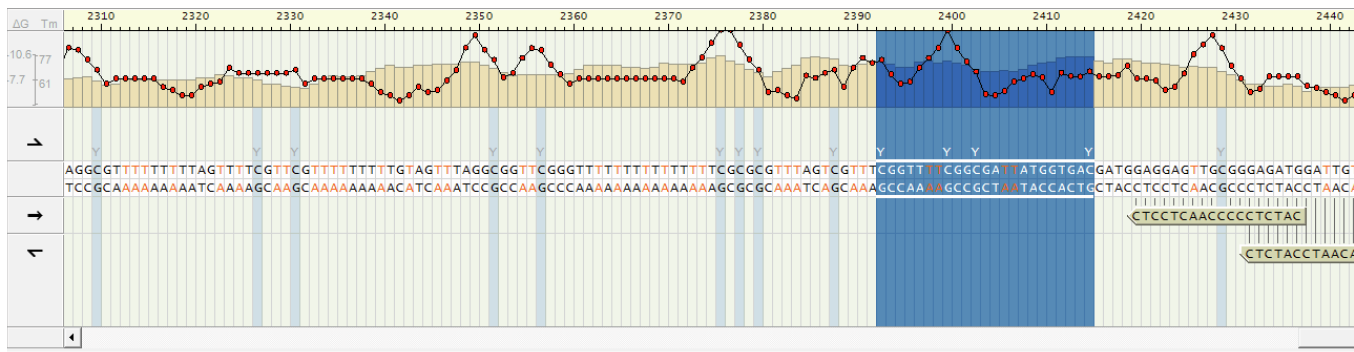

|                  |           |
|------------------|-----------|
| Primer Set 1     | Score: 73 |
| General Warnings |           |

|    |                           |
|----|---------------------------|
| F1 | AAGGGATAGGGAAGAAGAG       |
| R1 | CCTTTTAAACACTACAATCCATCTC |
| S1 | CATCTCCCAACTCTCTC         |

|                  |           |
|------------------|-----------|
| Primer Set 1     | Score: 73 |
| General Warnings |           |

|    |                           |
|----|---------------------------|
| F1 | AAGGGATAGGGAAGAAGAG       |
| R1 | CCTTTTAAACACTACAATCCATCTC |
| S1 | CATCTCCCAACTCTCTC         |

|                  | PCR Product | Forward PCR Primer, F1 | Reverse PCR Primer, R1 | Sequencing Primer, S1 |
|------------------|-------------|------------------------|------------------------|-----------------------|
| Length, nt       | 219         | 20                     | 27                     | 18                    |
| Position, 5'- 3' |             | 2239 - 2258            | 2457 - 2431            | 2436 - 2419           |

|                     |                                           |      |      |      |
|---------------------|-------------------------------------------|------|------|------|
| Warnings            |                                           |      |      |      |
| Tm, °C              |                                           | 59.9 | 60.3 | 45.7 |
| %GC                 | 32.4                                      | 50.0 | 37.0 | 61.1 |
| Sequence to Analyze | CATCRTACC ATAATCRCCR AAAACCRAAA CRACTAAAC |      |      |      |

### 3. DUSP5

[105](#)      previous assembly      GRCh37.p13 ([GCF\\_000001405.25](#))      10      NC\_000010.10 (112257625..112271302)

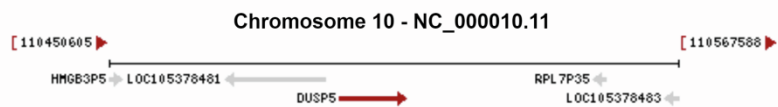

#### Genomic regions, transcripts, and products

Go to [reference sequence](#)

Genomic Sequence: [NC\\_000010.11](#) Chromosome 10 Reference GRCh38.p13 Primary Assembly

Go to nucleotide: [Graphics](#) [FASTA](#)

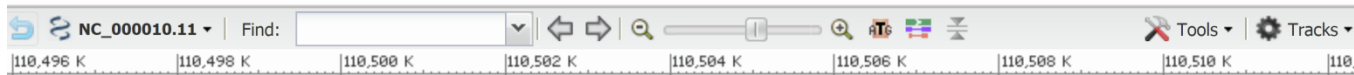

NCBI Homo sapiens Annotation Release 109.20190607

16.2 [NM\\_004419.4](#) [NP\\_004419.4](#)

mRNA [join\(1..594,4815..4963,9029..9248,12114..13627\)](#)

[/gene="DUSP5"](#)

[/gene synonym="DUSP; HVH3"](#)

[/product="dual specificity phosphatase 5"](#)

[/note="Derived by automated computational](#)

[analysis using](#)

[gene prediction method: BestRefSeq."](#)

[/transcript id="NM\\_004419.4"](#)

CDS [join\(216..594,4815..4963,9029..9248,12114..12520\)](#)

[/gene="DUSP5"](#)

1 ggcttctagg gCGgCGagCG gcCGggctgg ctatCGagCG agCGgggCGg  
gaaCGCGgag

181 gCGgCGCGgg gcCGctggcc ggCGgCGgCG gCGgcatgaa ggtcaCGtCG  
ctCGaCGggc

## Homo sapiens chromosome 10, GRCh38.p13

### Primary Assembly

NCBI Reference Sequence: [NC\\_000010.11](#)

[GenBank Graphics](#)

>NC\_000010.11:110495907-110511533 Homo sapiens chromosome 10,  
GRCh38.p13 Primary Assembly

CCACTCTCAAATAAAGCACCGATCCCGCACAGAGCCGCTCAGCGATGTTCCCAAATGCTATCCG  
GATCTTGTACTGAGTAAGATCCCTCGTTGGGGACTGCCCGGCCAAAGACTAAGACCCAAATGACTCAA  
AACAGCACAAGGCCCTCTGTTGCCTGACCCTGCTTAATCTGCTAATAAATACCAGAAGGCCCTTAGTCT  
CCCACATACTCCAGTACCGCACCATGCTGGGGGGTTCGTTTTTTGTTTTCTTTACCCCAAGCAGTTT  
CCTCTGCCTGGAATCTCCCTCCTGCTTCGACGCTGGCTTACAATTCATTCCTCGGAGTTGGCCTCAG  
CTCTCCTCTCCTCGGGAGGCCCTTCTCCAGCCCACGCCCCACCCTGCCACACCCCTACTGGGCGCTCTTC  
CCCACGGACTACAGGCCTTCCCTTCCCTCTGGGCTGGGGCAGCTGGGGCTGAGTATAAGTCTTACTC  
ACGTTGGTGCCGCCAGCCCCAAAACAAAGCCTGGCCCACTGGGTGCTCCGCGTATGTGTGTGGCTCTA  
GGCGGAGATGCCGGGGTGGAAAAGAGCGGTAACAGAAAAGAGAACTGCTAGAGGAAGAGCAGCCTGCA  
GGGAAGGCTGGCACAGATAACCACAAAAAGAAAGAGGCCCGCATCACGCTTTCACCAAGACCCAC  
TGGCAAGGCGAGGACAGCGCCTTTGGGTGGATGCATCTGTGACCCAGAGGCAATGCTGGCTGTCTGGT  
GTCTGATTTGATTGCATCTGATTTCAAATTTGATCTCTGCTTCCCTTCTGAAAACCTCATTCCCTTATG  
TCAGTTGTCAACAAGCCCTTGTCTAGTGGGCGAGACTGTTTTCCATCAAGCAGTCCCAGCCAGGCTAA  
CAATAAAATGGTTGGCAGTGAAGCTTGGGGCAGAAAACCTGTTTCCATCCATGTGTCCCAGCAGCTAGCA  
AAGCCCTGGCACACGCTGACCCCTCAATAAATGCTTGTGAATGGGTGAATGTGTCTGCTTCCCAGG  
AATAGGGGTGGGAGGCCGTAAGCCCTGGGGACCGTGGGGCAGACAGCCTGAGATTAACCTTGATCC  
ATAGATAATCCCCAAATCCAGAAGCCACCTGGACAACAGTTGGCTGAACTGAGCTCCATCGTGGGATA  
CATGCTGATGGTACTGCTGAGTTCACCAAGGGTCTCCCAGGACCAGAAAACAGCTCCTCAAATAACAA  
CTTATTATTCTAATCATTATTGGAGAGTGACAGAGAAAAGAGCGTCAATCCTTTGAGGGCAGAATCCAT  
TTAGGAAGATTAAATGGCTATTCTCACCGCGACCCCAACCCCGTTTTTACTTTTACAAACTTTATT  
ATGAAAAATATCAAACATACAGAAAAAGTGGAGAAAACAGTATAACGAATCGGCCACCCATCACCCAGC  
CTCAGCGATGACCAACCAGCGCCTGACCTCTCCAGTCATCTATACCCACCCCTCGAGGCAAAATCTCCG  
ACGTCCTCTCCTTACAACCGCGCAGACCTCGGTAGCGACCGGAATCCGTTCCGACTCCTCTGGGGCCCT  
GGCAGGCTCCCTCGGCCCTGCTAGCGCGGGCGGGCGGGTTCTCAGCCCACTCGTCCGGAAGCTGAAG  
GCCGCGATCGTGGCGCGCGCCCGCCCCCACTCGCGCTTCCCTCCTCGGTCCGACCGCGAGGGTACCG  
CGGCCCGGAGCGCCTGGGACACTCGACCGGCAGCAGCGGGTGATGCGCGAGTGAGTCCCTCAGCGAAG  
CGCGGAAGAGAGAACTGAAGAGGCGCCTTCCACTTCCCTCTCGCTCTAACCGCGCACCCCGCCCAGCGCGT  
CCCTCGCCCCCGCTGCCCCCGCCCCCTGCAGGGCGTGGCCAAGGCCGAGGGGCGGGGAAACACCCATAT  
TTGGCCTTATATGGGCAGCAGCGTCACTCGGACTCATTCACATAAAAAGCTGCGCGGCCGCGCGGAA  
TCCCAGGCTTCTAGGGCGCGAGCGGCAGGGCTGGCTATCGAGCGAGCGGGCGGGAAAGCGCGAGTTGC  
GCCCGCGCTCGGGCGCGGGCTCCTCGCGGCAGCCCCCGCGGGTCCCGTGCCTCGCCCGC  
GGACACCCTGGCCTGGACACCCTGGCCTGGGCACCAGCGGGGCGCGCGCGCGGGGCGCTGGCCCG  
CGCGCGCGCGGCATGAAGGTCACTCGCTCGACCGGGCGCCAGCTGCGCAAGATGCTCGCAAGGAGGC  
GGCGGCGCGCTGCTGGTGCTCGACTGCGGCCCTATCTGGCCTTCTGCTGCCTCGAACGTCGCGGCTC  
GCTCAACGTC AACCTCAACTCGGTGGTGTGCGGCGGGCCCGGGCGCGCGGTGTGCGCGCGCTACGT  
GCTGCCCGAAGGCGCGCGCGCGCGGCTCCTGCAGGAGGGCGCGCGCGCGTCCGCGGCCGTTGGTGGT  
GCTGGACCAGGGCAGCCGCACTGGCAGAAGCTCGAGAGGA



Inverse complement sequence design:

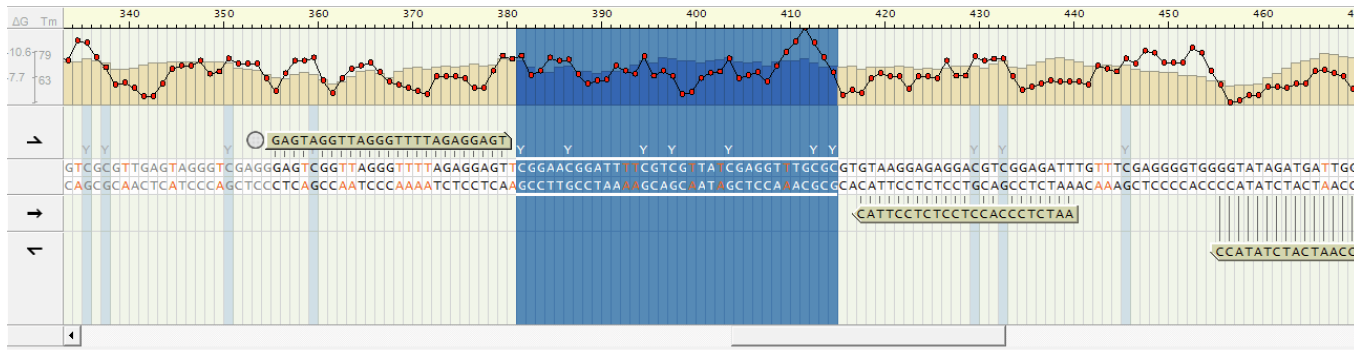

|                  |           |
|------------------|-----------|
| Primer Set 1     | Score: 89 |
| General Warnings |           |

|    |                           |
|----|---------------------------|
| F1 | GAGTAGGTTAGGGTTTTAGAGGAGT |
| R1 | AACCTCTCCAATCATCTATACC    |
| S1 | AATCTCCACCTCCTCTCCTTAC    |

|                  |           |
|------------------|-----------|
| Primer Set 1     | Score: 89 |
| General Warnings |           |

|    |                           |
|----|---------------------------|
| F1 | GAGTAGGTTAGGGTTTTAGAGGAGT |
| R1 | AACCTCTCCAATCATCTATACC    |
| S1 | AATCTCCACCTCCTCTCCTTAC    |

|                     | PCR Product                                                | Forward PCR Primer, F1 | Reverse PCR Primer, R1 | Sequencing Primer, S1 |
|---------------------|------------------------------------------------------------|------------------------|------------------------|-----------------------|
| Length, nt          | 122                                                        | 25                     | 22                     | 23                    |
| Position, 5'- 3'    |                                                            | 355 - 379              | 476 - 455              | 439 - 417             |
| Warnings            |                                                            |                        |                        |                       |
| Tm, °C              |                                                            | 59.9                   | 57.9                   | 44.3                  |
| %GC                 | 41.0                                                       | 44.0                   | 40.9                   | 52.2                  |
| Sequence to Analyze | ACRCRCAAAC CTRATAACR ACRAAAATCC RTTCRAACT CCTCTAAAC CCTAAC |                        |                        |                       |

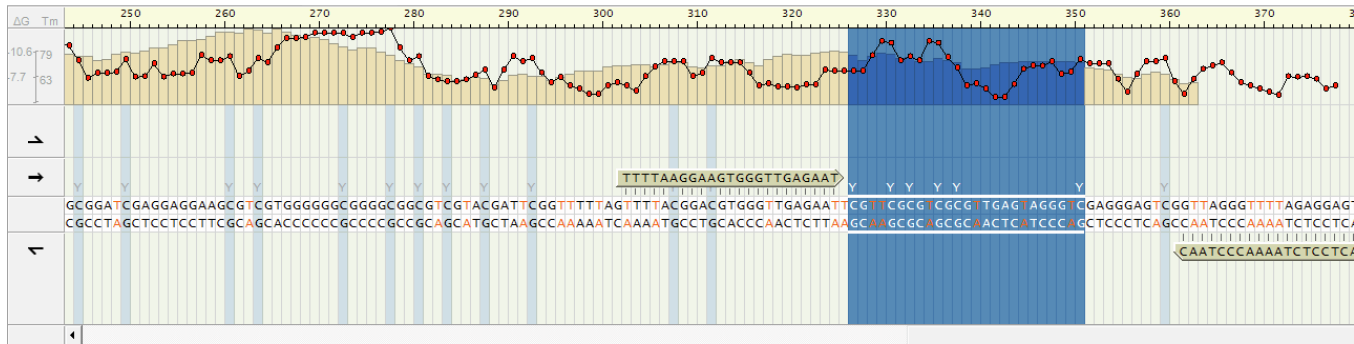

|                  |           |
|------------------|-----------|
| Primer Set 1     | Score: 76 |
| General Warnings |           |

|    |                         |
|----|-------------------------|
| F1 | TAGAGAGAGGAAGTGAAGG     |
| R1 | AACCTCTTAAACCTAAC       |
| S1 | TTTTAAGGAAGTGGGTTGAGAAT |

|                  |           |
|------------------|-----------|
| Primer Set 1     | Score: 76 |
| General Warnings |           |

|    |                         |
|----|-------------------------|
| F1 | TAGAGAGAGGAAGTGAAGG     |
| R1 | AACCTCTTAAACCTAAC       |
| S1 | TTTTAAGGAAGTGGGTTGAGAAT |

|                  | PCR Product | Forward PCR Primer, F1 | Reverse PCR Primer, R1 | Sequencing Primer, S1 |
|------------------|-------------|------------------------|------------------------|-----------------------|
| Length, nt       | 269         | 22                     | 20                     | 23                    |
| Position, 5'- 3' |             | 112 - 133              | 380 - 361              | 302 - 324             |

|                     |                                                          |      |      |      |
|---------------------|----------------------------------------------------------|------|------|------|
| Warnings            | Deviation from optimal amplicon size                     |      |      |      |
| Tm, °C              |                                                          | 57.5 | 55.8 | 44.1 |
| %GC                 | 39.4                                                     | 50.0 | 40.0 | 34.8 |
| Sequence to Analyze | TYGTTYGYGT YGYGTTGAGT AGGGTYGAGG GAGTYGGTTA GGGTTTTAGA G |      |      |      |

[Supplemental table 6 and Supplemental table 7: The mRNA variation abundance for TUG1-knockdown in HTR-8/SVneo cells, which can be found online at Xu et al<sup>\[1\]</sup>](#)

[1]Xu, Y., Ge, Z., Zhang, E., Zuo, Q., Huang, S., Yang, N., Wu, D., Zhang, Y., Chen, Y., Xu, H., Huang, H., et al. (2017). The lncRNA TUG1 modulates proliferation in trophoblast cells via epigenetic suppression of RND3. *Cell Death Dis* 8, e3104. 10.1038/cddis.2017.503.
